1 **Human alveolar lining fluid from the elderly promotes *Mycobacterium tuberculosis***  
2 **growth in alveolar epithelial cells and bacterial translocation into the cytosol**

3 Angélica M. Olmo-Fontánez<sup>1,2</sup>, Julia M. Scordo<sup>1,3</sup>, Andreu Garcia-Vilanova<sup>1</sup>, Diego Jose  
4 Maselli<sup>4</sup>, Jay I. Peters<sup>4</sup>, Blanca I. Restrepo<sup>5</sup>, Daniel L. Clemens<sup>6</sup>, Joanne Turner<sup>1</sup>, Larry S.  
5 Schlesinger<sup>1</sup>, and Jordi B. Torrelles<sup>1</sup>

6  
7 <sup>1</sup>Population Health and Host Pathogen Interactions Programs, Texas Biomedical Research  
8 Institute, San Antonio, TX, 78227, USA. <sup>2</sup>Integrated Biomedical Sciences Program, University of  
9 Texas Health Science Center at San Antonio, TX, 78229, USA. <sup>3</sup>Sam and Ann Barshop Institute  
10 for Longevity and Aging Studies, University of Texas Health Science Center at San Antonio, TX,  
11 78229, USA. <sup>4</sup>Division of Pulmonary and Critical Care Medicine, School of Medicine, University  
12 of Texas Health Science Center at San Antonio, TX, 78229, USA. <sup>5</sup>University of Texas Health  
13 Science Center at Houston, School of Public Health, Brownsville campus, Brownsville, TX  
14 78520, USA; and South Texas Diabetes and Obesity Institute, University of Texas Rio Grande  
15 Valley, Edinburg, TX 78541, USA; <sup>6</sup>University of California, Los Angeles Health Sciences, Los  
16 Angeles, CA, 90095, USA.

17 **Corresponding Author:** Dr. Jordi B. Torrelles, Texas Biomedical Research Institute, San  
18 Antonio, TX, 78227, USA. Email: [jtorrelles@txbiomed.org](mailto:jtorrelles@txbiomed.org).

19  
20 **Conflict of interest:** The authors declare no conflict of interest.

21  
22 **Running Title:** Human lung mucosa influences *M.tb* growth in ATs.

23 **Keywords:** *Mycobacterium tuberculosis*; aging; alveolar epithelial cells; alveolar lining fluid;  
24 cytosol; tuberculosis.

25 **ABSTRACT**

26 The elderly population is at significant risk of developing respiratory diseases, including  
27 tuberculosis (TB) caused by the airborne *Mycobacterium tuberculosis* (*M.tb*). Once *M.tb* reaches  
28 the alveolar space, it contacts alveolar lining fluid (ALF) which dictates host cell interactions. We  
29 previously determined that age-associated dysfunctionality in human ALF soluble innate  
30 components lead to accelerated *M.tb* growth within human alveolar macrophages. Here we  
31 determined the impact of human ALF on *M.tb* infection of alveolar epithelial cells (ATs), another  
32 critical cellular determinant of infection. We observed that E-ALF-exposed *M.tb* had significantly  
33 increased intracellular growth in ATs compared to adult ALF (A-ALF)-exposed bacteria. Despite  
34 this, there were no alterations in AT inflammatory mediators or cell activation. However,  
35 exposure to E-ALF altered endosomal trafficking of *M.tb*, driving bacterial translocation to both  
36 endosomal and cytosolic compartments in ATs. Our results indicate that exposure of *M.tb* to E-  
37 ALF promotes translocation of bacteria into the AT cytosol as a potential favorable niche for  
38 rapid bacterial growth and at the same time dampens AT's immune responses. Thus, our  
39 findings highlight the influence of the elderly lung mucosa on *M.tb* infection of ATs, an unexplored  
40 contributing factor to the elderly population's increased susceptibility of developing active TB  
41 disease.

42

43

44

45

46

47

48

49

50

## 51 INTRODUCTION

52 Tuberculosis (TB) is one of the leading causes of death due to an infectious disease and is  
53 considered a global threat killing over 4,500 people every day.<sup>1</sup> The risk of TB susceptibility and  
54 mortality is significantly increased in individuals aged 65 and older.<sup>2, 3</sup> TB is caused by airborne  
55 *Mycobacterium tuberculosis* (*M.tb*), transmitted primarily by inhalation, where it is deposited into  
56 the distal portion of the airways and alveoli. In this environment, *M.tb* encounters the lung  
57 mucosa, or alveolar lining fluid (ALF), which contains soluble innate factors such as surfactant  
58 proteins A and D (SP-A/SP-D), hydrolytic enzymes, complement, lipids, and others, which  
59 activate subsequent innate and adaptive immune responses.<sup>4-6</sup>

60

61 As we age, changes to soluble components of the innate immune system in ALF may contribute  
62 to the increased susceptibility of the elderly population to TB.<sup>7, 8</sup> Published studies from our labs  
63 found that ALF from elderly humans and old mice have increased levels of pro-inflammatory and  
64 pro-oxidative mediators, impacting *M.tb* infection outcomes *in vitro* and *in vivo*.<sup>9</sup> Human  
65 macrophages infected with *M.tb* exposed to elderly human ALF (E-ALF) have reduced control  
66 of infection and altered intracellular trafficking with fewer phagosome–lysosome fusion events.  
67 These observations were reversed when E-ALF was replenished with functional SP-A/SP-D,  
68 supporting the importance of the functionality of ALF innate components in *M.tb* control.<sup>9</sup> This  
69 was also observed *in vivo*, where *M.tb* that had been exposed to E-ALF grew faster and induced  
70 more lung immunopathology in young infected mice.<sup>9</sup>

71

72 Most studies focus on the role of ALF in altering *M.tb*-phagocyte interactions;<sup>4, 10, 11</sup> however, it  
73 is critical to understand the impact of ALF on *M.tb* infection of non-professional phagocytes, in  
74 particular, alveolar epithelial type cells (ATs).<sup>12, 13</sup> ATs are the most prevalent cell population that  
75 covers the internal surface area of the alveolar environment.<sup>14</sup> The alveolar epithelium contains

76 two main epithelial cell types that maintain alveolus integrity, preventing microbial dissemination.  
77 Type I ATs are the most abundant cell type, providing a structural role in shaping the alveolus  
78 and allowing for gas exchange.<sup>14</sup> Type II ATs are spherical pneumocytes that comprise less than  
79 5% of the surface area yet constitute 60% of the ATs and play an essential role in host defense  
80 and in maintaining alveolar homeostasis by secreting and recycling ALF components such as  
81 surfactant proteins, hydrolases, and mucosal antibodies, among others.<sup>15-17</sup>

82

83 When *M.tb* reaches the alveoli it first interacts with ATs and alveolar macrophages, with  
84 subsequent invasion and replication within the alveolar epithelial barrier.<sup>18</sup> *M.tb* expresses a  
85 variety of virulence factors such as a heparin-binding hemagglutinin (HBHA) and malate  
86 synthase that promote adherence and entry into ATs.<sup>19, 20</sup> Given that ATs are non-professional  
87 phagocytes, they are proposed to provide a protective niche that enables *M.tb* to replicate and  
88 elude an innate immune response. Nonetheless, ATs also participate in immune responses  
89 involved in controlling *M.tb* infection by producing pro-inflammatory cytokines (TNF, IL-8, and  
90 GM-CSF), thereby potentiating cellular crosstalk and activation of alveolar macrophages leading  
91 to an increase in their antimycobacterial activity.<sup>21</sup> An additional host defense mechanism of ATs  
92 is the secretion of innate immune molecules, e.g., SP-A, SP-D, complement component 3 (C3),  
93 antimicrobial peptides, antibodies, and hydrolases, among others into the ALF that exhibits an  
94 essential role facilitating cell recruitment, microbial killing<sup>16</sup> and even driving the differential  
95 outcome of *M.tb* infection in ATs.<sup>13</sup> We recently found that *M.tb* exposed to ALF from healthy  
96 adults vary in growth rates within ATs, which was dependent on ALF protein oxidation levels and  
97 function.<sup>13</sup> Based on these findings and our characterization of the elderly lung environment, we  
98 aimed to determine the impact of the elderly lung mucosa on *M.tb* infection of ATs. We provide  
99 evidence that *M.tb* exposure to E-ALF drives increased *M.tb* replication and growth in ATs, as  
100 well as *M.tb* translocation to both endosomal and cytosolic compartments in ATs, keeping

101 unaltered AT cell death and early immune responses against the infection. These findings  
102 indicate that E-ALF promotes *M.tb* growth within ATs potentially by exploiting the AT cytosol as  
103 a protective replicative niche for *M.tb*.

104

105

## 106 RESULTS

### 107 ***M.tb* exposure to elderly human ALF drives increased bacterial intracellular growth in** 108 **alveolar epithelial cells (ATs) *in vitro***

109 Our prior studies have shown that *M.tb* exposure to ALF from elderly individuals (E-ALF)  
110 accelerates the growth of *M.tb* within human alveolar macrophages and human monocyte-  
111 derived macrophages.<sup>9</sup> Here we observed that *M.tb* previously exposed to E-ALF also  
112 demonstrates significantly increased intracellular growth in ATs when compared to A-ALF-  
113 exposed *M.tb* (**Fig. 1A**). This increased bacterial growth of E-ALF-exposed *M.tb* was not due to  
114 differences in the inoculum used and/or uptake by ATs, because the inoculum of *M.tb* exposed  
115 to E-ALF or A-ALF and levels of uptake were equivalent (**Fig. 1B-C**). We further confirmed that  
116 intracellular growth differences within ATs were not due to changes in AT cell viability after  
117 infection with *M.tb* exposed to either A-ALF or E-ALF over the infection period (120 h) (**Suppl.**  
118 **Fig. S1**). We next explored the surface expression of e-Cadherin (CD324) on ATs in the different  
119 treatment groups. Our results showed high e-Cadherin expression throughout the infection,  
120 indicating that cell-cell interfaces between ATs were stable,<sup>22</sup> consistent with high cell viability  
121 (data not shown). Together these data provide evidence for enhanced E-ALF-*M.tb* intracellular  
122 growth in ATs compared to bacteria exposed to A-ALF.

123 We next determined the rate of bacterial replication of A-ALF vs. E-ALF-exposed *M.tb* during AT  
124 infection, using the fluorescent replication reporter SSB-GFP, smyc':::mCherry *M.tb* strain. This  
125 *M.tb* reporter contains a single-stranded DNA binding protein that allows for the quantification of

126 actively replicating bacteria.<sup>23</sup> Our results indicate that E-ALF-exposed *M.tb* have enhanced  
127 replication at 24 h post-AT infection (**Fig. 2**), which supports the increased growth of E-ALF *M.tb*  
128 within ATs over time (**Fig. 1A**). This increase in replication was observed until 72 h post-infection;  
129 however, at this time point, both A-ALF and E-ALF had a similar replication rate (**Fig. 2A**).

130

### 131 **E-ALF exposure decreases *M.tb* bacilli trafficking to late endosomes within ATs**

132 Differential trafficking of *M.tb* within ATs may allow for bacterial evasion of killing or serve as a  
133 host killing mechanism,<sup>13</sup> depending on cellular location. Using GFP expressing *M.tb*, we  
134 quantified co-localization of A-ALF vs. E-ALF-exposed *M.tb* with AT intracellular markers  
135 visualized by laser scanning confocal microscopy: Rab5 is an early endosomal marker, Rab7 is  
136 a late endosomal marker, LC3 is a marker of autophagosomes, LAMP-1 and CD63 are  
137 lysosomal markers, and ABCA1 (marker of multivesicular bodies) and ABCA3 (marker of  
138 lamellar bodies) are ATP-binding cassette lipid transporters. E-ALF-exposed *M.tb* demonstrated  
139 significantly decreased co-localization events for the late endosomal marker, Rab7, at 72 hours  
140 post-infection (**Fig. 3**). Single co-localizations of Rab5 (and not Rab7) with GFP expressing *M.tb*  
141 were not detected, consistent with previous studies in which at just 4 h post-infection nearly all  
142 *M.tb* bacilli were associated with Rab7 positive compartments.<sup>24</sup> For the remainder of the  
143 intracellular markers studied (lysosome LAMP-1 and CD63, autophagosome LC3, multivesicular  
144 body ABCA1, lamellar body ABCA3), there were no significant differences in the percentage of  
145 A-ALF-exposed GFP *M.tb* co-localization events vs. E-ALF-exposed GFP *M.tb* co-localization  
146 events, at 72 hours post-infection (**Fig. 4**). Moreover, A-ALF or E-ALF-exposed *M.tb* were in  
147 equivalent acidified vacuoles as indicated by their co-localization with LysoTracker-Red (**Fig. 5**).

148 Overall, exposure to E-ALF significantly decreases trafficking of *M.tb* to late endosomes within  
149 ATs.

150

## 151 **E-ALF-exposed *M.tb* has increased cytosolic location in infected ATs**

152 While it is well accepted that *M.tb* traffics through the endosomal pathway in phagocytic cells,  
153 less is known about *M.tb* intracellular localization within non-phagocytic cells such as ATs.  
154 Bacteria, including *M.tb*, can escape from phagosomes into the host cell cytosol as an alternative  
155 mechanism of survival within phagocytes.<sup>25, 26</sup> Our results indicate that, at 72 hours after  
156 infection, A-ALF-exposed *M.tb* is primarily located in endosomal/lysosomal (vacuoles)  
157 compartments in ATs using transmission electron microscopy (TEM) (**Fig. 6**). In contrast, a much  
158 greater percentage of E-ALF-exposed *M.tb* was observed in the cytosol (56.3% vs. 16.9%) (**Fig.**  
159 **6A**). The designation of cytosolic bacteria was determined by a lack of vacuolar (endosomal)  
160 membranes surrounding bacteria (**Fig. 6B**). Together, the TEM and confocal microscopy results  
161 define the overall location distribution of E-ALF and A-ALF-exposed *M.tb* within AT intracellular  
162 compartments (**Fig. 6C**), demonstrating that the majority of A-ALF-exposed *M.tb* remain in late  
163 endosomal compartments while E-ALF-exposed bacteria are increasingly present in the cytosol.  
164 We speculate that increased translocation of *M.tb* from the endosome to the cytosol for E-ALF-  
165 exposed *M.tb* may represent one mechanism by which the bacteria are able to have increased  
166 intracellular growth in ATs.

## 167 168 **Effect of A- and E-ALF-*M.tb* on AT surface marker expression**

169 ATs are the major structural cell population of the alveolar environment<sup>14</sup> and, active participants  
170 in lung immunity. ATs can activate infiltrating myeloid cells and lymphocytes by acting as  
171 antigen-presenting cells through surface expression of major histocompatibility complexes I and  
172 II (MHC I/II).<sup>27, 28</sup> In this regard, at 24 h post-infection, we observed a higher percentage of HLA-  
173 ABC (MHC Class I) expression in both A-ALF and E-ALF-*M.tb*-infected ATs in comparison with  
174 HLA-DR/DP/DQ (MHC Class II) (**Fig. 7**), and this expression increased over time (120 h) (**Fig.**  
175 **7A; Suppl. Fig. S2A**). Moreover, A-ALF *M.tb*-infected ATs showed an increase (compared with

176 uninfected ATs) in the percentage of surface expression and MFI values for HLA-DR/DP/DQ  
177 over time although the data did not reach statistical significance (**Fig. 7B; Suppl. Fig. S2B**).  
178 Interestingly, HLA-DR/DP/DQ expression in E-ALF *M.tb*-infected ATs remained unchanged with  
179 respect to uninfected ATs (**Fig. 7B**), which could derive in less T cell activation in the elderly.  
180 Thus, we observed that both E-ALF and A-ALF-*M.tb* drive similar MHC surface markers  
181 expression in ATs.

182

### 183 **Effect of A-ALF and E-ALF-*M.tb* on the production of immune mediators**

184 Considering that *M.tb* exposure to E-ALF drives increased intracellular bacterial growth in ATs,  
185 we tested whether E-ALF-exposed *M.tb* increase levels of AT pro-inflammatory cytokines and  
186 chemokines, reflecting increased AT activation. We quantified the production of immune  
187 mediators responsible for immune cell infiltration toward the site of infection and/or for promoting  
188 immune cell proliferation and maturation in the AT cultures.<sup>29</sup> Both A-ALF and E-ALF-exposed  
189 *M.tb* infection induced mainly pro-inflammatory cytokines by ATs when compared to uninfected  
190 ATs, which was maintained over time (up to 120 h studied). This increasing trend was the case  
191 for TNF and IL-6, with IL-18 reaching significant levels (**Fig. 8A**). Significant production of  
192 chemokines was also observed from AT cultures infected with A-ALF and E-ALF-exposed *M.tb*  
193 compared to uninfected ATs. This was particularly the case for the following chemokines:  
194 CCL2/MCP-1, CCL5/RANTES, and IL-8/CXCL8 at later time points post-infection (**Fig. 8B**). GM-  
195 CSF also was significantly produced at later time-points (**Fig. 8B**). Overall, we did not observe  
196 significant differences in AT immune mediator production during infection between A-ALF or E-  
197 ALF-exposed *M.tb*. Thus, exposure to E-ALF enhances *M.tb* replication and growth in ATs  
198 without altering cell activation compared to A-ALF-exposed bacteria.

199



200

## 201 **DISCUSSION**

202 TB remains one of the top 10 causes of death worldwide.<sup>1</sup> The elderly population (65 years or  
203 older) with inherent compromise in immunity is at higher risk of developing active TB disease.<sup>3</sup>  
204 Additionally, the elderly may have additional comorbidities (e.g., diabetes, hyperglycemia, HIV  
205 co-infection, malnutrition, smoking, among others) that would make them even more vulnerable  
206 to primary *M.tb* infection and reactivation of a latent infection to active TB disease.<sup>3, 30, 31</sup>  
207 Therefore, it is critical to study how the lung environment changes as we age, and the impact of  
208 these changes on the establishment of respiratory infections, such as *M.tb*. We have published  
209 that the elderly lung mucosa contains many oxidized proteins and constitutes an inflammatory  
210 environment, with dysfunctional surfactant proteins and complement function.<sup>9</sup> Moreover, we  
211 have established that upon contacting the elderly lung mucosa, *M.tb* replicates faster in human  
212 macrophages and has increased bacterial burden *in vivo* in C57BL/6 mice, inducing increased  
213 lung tissue damage.<sup>9</sup> Here we determined that after exposure to the elderly lung mucosa or E-  
214 ALF, *M.tb* infects alveolar epithelial cells (ATs), the major non-phagocytic cell of the alveolar  
215 space, equivalently to A-ALF-exposed *M.tb*. However, E-ALF exposed bacteria replicated faster  
216 inside ATs. This finding was associated with the fact that E-ALF-exposed bacteria were found  
217 to a much greater extent in the cytosol, suggesting that this location is a favorable niche for the  
218 bacteria to establish infection, averting host immune response (**Fig. 9**).

219

220 Once *M.tb* reaches the alveolar space, it is recognized by resident or recruited phagocytes,  
221 including alveolar macrophages, dendritic cells, and/or neutrophils.<sup>32</sup> Although *M.tb* uptake by  
222 phagocytes does not always lead to clearance of infection, macrophages from elderly individuals  
223 are more permissive to intracellular growth.<sup>2, 33</sup> Another cell population particularly crucial in the  
224 early stages and outcomes of *M.tb* infection are the non-professional phagocytes ATs.<sup>15, 34</sup> ATs

225 line the alveolar epithelium forming a physical barrier that prevents rapid invasion and plays a  
226 critical role in host defense to control *M.tb* infection.<sup>15, 32</sup> One of the significant roles is the  
227 production of components within the alveolar mucosa, or alveolar lining fluid (ALF), composed  
228 of a surfactant monolayer and an aqueous hypophase surrounding alveolar compartment cells.<sup>15</sup>  
229 We have shown that innate soluble components of ALF, including homeostatic hydrolytic  
230 enzymes, modify the *M.tb* cell envelope and allow for better recognition by cells of the immune  
231 system.<sup>4-6</sup> In this regard, it remains unclear if E-ALF-exposed *M.tb* infection of ATs alters their  
232 production of ALF innate soluble components, which would also impact the outcome of infection  
233 in the elderly.

234

235 Our group has previously published that ALF from elderly individuals have increased levels of  
236 pro-inflammatory and pro-oxidative mediators.<sup>9</sup> Furthermore, human macrophages infected with  
237 elderly human ALF-exposed *M.tb* had reduced control of infection.<sup>9</sup> Considering that most  
238 studies focus only on the role of ALF in altering *M.tb*-phagocyte interactions, we aimed to  
239 determine the impact of the adult and elderly lung mucosa on *M.tb* infection of ATs. Here, we  
240 show that *M.tb* exposure to human E-ALF drove significantly increased intracellular bacterial  
241 growth in ATs. This finding supports the importance of ALF in old age which has a different  
242 composition<sup>7</sup> in enhancing *M.tb* infection by allowing *M.tb* to replicate faster in both alveolar  
243 phagocytic<sup>9</sup> and non-phagocytic cells. Our results also indicate that E-ALF-exposed *M.tb* does  
244 not activate ATs; nor kill them, enabling the continued growth of E-ALF-exposed *M.tb* within ATs  
245 over time.

246

247 The *M.tb* phagosome in macrophages shares features with early endosomes due to blockage  
248 of EEA1 and Rab7 recruitment,<sup>35, 36</sup> whereas *M.tb* was found to traffic to late endosomes in  
249 epithelial cells.<sup>37</sup> Our results are consistent with previous studies in which *M.tb* vacuoles in

250 alveolar and bronchial epithelial cell lines resides mainly in Rab7 positive compartments.<sup>24, 37</sup>  
251 Notably, exposure to E-ALF decreased *M.tb* endosome association with Rab7 in late endosomes  
252 in ATs. In this regard, we found similar results in ATs infected with higher MOIs (data not shown).  
253 Our data showed no significant differences in the percentage of co-localization events of A-ALF  
254 or E-ALF-exposed *M.tb* within additional AT intracellular compartments (*i.e.*, LAMP-1, CD63,  
255 LC3, ABCA1, ABCA3) consistent with our previous studies showing that *M.tb* bacilli exposed to  
256 different human A-ALFs did not have altered intracellular trafficking in those compartments within  
257 ATs.<sup>13</sup> Here we further explored the location of *M.tb* within ATs by TEM to better understand the  
258 differences in intracellular growth and trafficking. We found that E-ALF-exposed *M.tb* are located  
259 in both vacuolar and cytosolic compartments, whereas A-ALF-exposed *M.tb* bacilli are located  
260 mainly in vacuoles, where ATs could potentially better control their replication and growth.

261

262 Several studies performed in macrophages have shown how *M.tb* can employ different  
263 mechanisms of survival, including, inhibition of phagosome-lysosome fusion,<sup>38</sup> suppression of  
264 the autophagy pathway<sup>39</sup> and escape from phagosomes into the cytosol.<sup>25, 26</sup> However,  
265 trafficking patterns of *M.tb* in ATs seem to differ as *M.tb* is contained mainly in late (Rab7)  
266 endosomal compartments and lysosomal fusion with late endosomes is inhibited, supporting its  
267 increased survival within ATs.<sup>37</sup> In this regard, we note that *M.tb* bacilli traffic to late endosomes  
268 in ATs, but upon exposure to E-ALF, *M.tb* decreased association with Rab7 positive  
269 compartments as it translocated into the cytosol, a potential niche to increase its replication rate.

270

271 The autophagy pathway is an alternative killing mechanism against intracellular pathogens when  
272 they escape from the typical phagosome/lysosome fusion killing mechanism.<sup>40, 41</sup> Since E-ALF-  
273 exposed *M.tb* was located in the cytosol where there is a high bacterial replication rate, we  
274 explored if autophagy was attenuated in ATs infected with E-ALF-exposed *M.tb*. Our results

275 indicate that A-ALF and E-ALF exposure did not alter *M.tb* bacilli trafficking to autophagosomes  
276 (no differences in LC3 positive compartments) within ATs. Although autophagy has been  
277 described as an alternative killing mechanism of *M.tb* in macrophages, it could also play an  
278 opposite role in mycobacterial trafficking in ATs if it fails to eliminate the bacterial burden.<sup>37</sup> In  
279 fact, inactivation of the autophagy pathway using 3-methyladenine decreased *M.tb* intracellular  
280 growth and was advantageous for ATs survival.<sup>37</sup> Lastly, exclusively pathogenic mycobacteria  
281 species, including *M.tb*, are reported to translocate from the phagolysosome into the cytosol  
282 facilitated by the ESAT-6 secretion complex-1 (ESX-1 type VII secretion system) in  
283 macrophages.<sup>42</sup> While more studies are needed to elucidate whether the *M.tb* ESX-1 type VII  
284 secretion system also mediates *M.tb* translocation into the cytosol in non-professional  
285 phagocytes, *M.tb* genes encoding ESAT-6 proteins are upregulated during *M.tb* infection of  
286 ATs.<sup>43</sup> Given that E-ALF exposure promoted *M.tb* growth within ATs and greater translocation  
287 to the cytosol we speculate this may be a mechanism for better survival of *M.tb* in ATs. Ongoing  
288 studies in our lab are focused on determining the *M.tb* metabolic status within ATs at the time of  
289 its translocation into the cytosol to elucidate the bacterial mechanism involved in this process.

290

291 Additional mechanisms that ATs may use to contribute to the innate and adaptive immune  
292 responses after *M.tb* infection are, first, bacterial uptake by recognition and binding of microbial  
293 associated molecular patterns present on the *M.tb* surface;<sup>32</sup> and second, modulation of the cell  
294 to cell crosstalk by the production of immune mediators.<sup>29, 34</sup> We have found that *M.tb* infected  
295 ATs secrete some cytokines (e.g. IL-18), but mainly chemoattractants (e.g. CCL2,  
296 CCL5/RANTES, and IL-8) at later time points post-infection. Some of these immune mediators  
297 are significantly induced by E-ALF-exposed vs. A-ALF-exposed *M.tb* (e.g. CCL5/RANTES) and  
298 are critical to the initiation of local inflammatory responses, mainly cell recruitment (e.g.  
299 neutrophils), and activation of host innate cells and even induction of cell-mediated immunity

300 after *M.tb* infection, which could unbalance local immunity towards favoring *M.tb* infection spread  
301 being detrimental for the host.<sup>34</sup>

302

303 Here we show that during infection in ATs, E-ALF-exposed *M.tb* induced similar changes in  
304 surface marker expression or in the production of immune mediators when compared to A-ALF-  
305 exposed *M.tb*, possibly hindering alveolar compartment cells activation, infiltration, and  
306 differentiation. Indeed, when compared to uninfected cells, E-ALF-exposed *M.tb* did not induce  
307 the expression of MHC-II on the AT surface, potentially negatively influencing T cell activation.  
308 Altogether, our data reveal that *M.tb* exposure to the inflammatory E-ALF environment which  
309 contains an array of oxidized proteins<sup>7, 9</sup> enhances *M.tb* intracellular growth in ATs, while  
310 promoting translocation of bacteria to the AT cytosol as a potential niche for establishing and  
311 propagating *M.tb* infection. Our study highlights the impact of elderly lung mucosa on *M.tb*  
312 infection of ATs, critical non-professional phagocytes that impact TB as well as other respiratory  
313 infectious diseases.

314

315

## 316 **MATERIALS AND METHODS**

317 ***Ethics Statement and Human Subjects*** - Human subject studies were carried out in strict  
318 accordance with the US Code of Federal and Local Regulations (OSU Institutional review board  
319 (IRB) numbers 2012H0135, and 2008H0119 and Texas Biomedical Research Institute/UT-  
320 Health San Antonio/ South Texas Veterans Health Care System IRB number HSC20170673H.  
321 Bronchoalveolar lavage fluid (BALF) from healthy adults (aged 18-45 years) and elderly (aged  
322 60 years and older) individuals were recruited from both sexes without discrimination of race or  
323 ethnicity after informed written consent. See Supplementary Information for details.

324

325 **Human ALF isolation** - ALF was obtained and concentrated from human bronchoalveolar  
326 lavage fluid (BALF) from healthy adults and elderly donors. ALF was normalized as previously  
327 described,<sup>4, 9, 11</sup> to obtain the physiological concentration present within the lung (at 1 mg/mL of  
328 phospholipid). Briefly, BAL was performed in sterile 0.9% NaCl, filtered (0.2 µm pore size sterile  
329 filter system), and subsequently concentrated 20-fold by using a 10-kDa molecular mass cutoff  
330 membrane Centricon Plus (Amicon Bioseparations) device at 4°C, aliquoted in low protein  
331 binding-sterile tubes and stored at -80°C.

332

333 **AT culture** - For all experimental procedures, we utilized the human ATs type II-like cell line  
334 A549 (ATCC® CCL-185™) as a lung carcinoma cell line that exhibits most AT type II cells traits  
335 (model of ATs). Cell cultures were prepared as we previously described<sup>13</sup> with minor changes.  
336 Briefly, the A549 cell line was cultured at 37 °C with 5% CO<sub>2</sub> in DMEM/F12 supplemented with  
337 10% FBS (Atlas Biologicals, Fort Collins, CO) and 1% PenStrep (Sigma, St. Louis, MO), allowing  
338 at least three weeks of passages prior to use in experiments. Cells were maintained in antibiotic-  
339 free growth medium one week before doing *M.tb* infection.

340

341 ***M.tb* cultures** - *M.tb* H<sub>37</sub>R<sub>v</sub>-Lux (27294) (kindly provided by Drs. Abul Azad and Larry  
342 Schlesinger, Texas Biomedical Research Institute) was grown as described.<sup>44, 45</sup> SSB-GFP,  
343 smyc':::mCherry *M.tb* Erdman (kindly provided by Dr. David Russell, Cornell University) was  
344 grown as described.<sup>23</sup> GFP-*M.tb* Erdman (kindly provided by Dr. Marcus Horwitz, UCLA) was  
345 grown as previously described.<sup>4</sup> Single bacterial suspensions were prepared as we described.<sup>9</sup>

346

347

348 **Exposure of *M.tb* bacteria to human ALF** - Preparation of adult and elderly ALF-exposed *M.tb*  
349 was performed as we previously described.<sup>10, 11, 13</sup> ALF-exposed *M.tb* inoculums were serially  
350 diluted in 7H9 broth and plated on 7H11 agar to determine *M.tb* viability and specifically to  
351 confirming no differences in viable bacterial counts among E-ALF vs. A-ALF-exposed *M.tb*.

352

353 ***M.tb* infection and luciferase-based intracellular growth of ATs** - *M.tb* infection of ATs was  
354 performed as previously described.<sup>13</sup> Briefly, single cell suspensions of *M.tb* in DMEM/F12/FBS  
355 media were added to the ATs culture at various MOIs, and cells were incubated for 2 h with the  
356 first 30 min on a platform shaker. After infection, unbound bacteria were removed by washing,  
357 and gentamicin (50 µg/mL)-supplemented medium was added for 1 h to kill extracellular  
358 bacteria. Following this, cells were washed and incubated with 10 µg/mL gentamicin-  
359 supplemented medium for the indicated times. For luciferase-based *M.tb* growth assays,<sup>45</sup> ATs  
360 were infected with *M.tb* H<sub>37</sub>R<sub>v</sub>-Lux, and bacterial bioluminescence was measured every 24 h for  
361 up to 120 h with a GloMax Multi Detection System (Promega, Madison, WI). For the *M.tb*  
362 replication rate experiment, ATs were infected with SSB-GFP, smyc':mCherry *M.tb* Erdman  
363 strain. For intracellular trafficking, acidification assay, and electron microscopy experiments, ATs  
364 were infected with GFP-*M.tb* Erdman (GFP, 488 nm) strain.

365

366 **AT cell viability assay** - At indicated times post-infection, AT cytotoxicity was determined by  
367 CellTiter-Glo® luminescent cell viability assay (Promega Cat. #G7570) following the  
368 manufacturer's instructions. See Supplementary Information for details.

369



370 ***Immunocytochemistry and Confocal Microscopy*** - ATs monolayers on glass coverslips were  
371 infected for 2 h with A-ALF- or E-ALF-exposed *M.tb* at MOI 10:1 and processed as described.<sup>13</sup>  
372 Briefly, at 72 hours post-infection, ATs were fixed with cold 4% paraformaldehyde for 15 min at  
373 room temperature and permeabilized with 0.1% Triton-X100 in PBS for 10 min at room  
374 temperature. To evaluate the *M.tb* intracellular trafficking, cellular compartments were stained  
375 with primary Abs in confocal blocking buffer (5 mg/ml BSA, 5% HI-FBS, 10% donkey serum,  
376 0.03% Triton X-100) for overnight incubation at 4°C. Following this, the secondary Abs or  
377 matched isotype controls were incubated for 1 h at 37°C.

378 Intracellular markers used were Rab5A (early endosomal marker; mouse anti-human Rab5A;  
379 1:200; Cell Signaling Technology Cat. #46449), Rab7 (late endosomal marker; rabbit anti-human  
380 Rab7; 1:100; Cell Signaling Technology Cat. #9367), LAMP-1 (lysosomal marker; mouse anti-  
381 human LAMP-1; 2 µg/ml; DSHB Cat. #P11279), CD63 (lysosomal marker; mouse anti-human  
382 CD63; 1 µg/ml; BD Biosciences Cat. #556019), LC3-II (autophagy marker; rabbit anti-human  
383 LC3; 1:200; Cell Signaling Technology Cat. #3868), ABCA1 (ATP-binding cassette lipid  
384 transporter marker of multivesicular bodies; mouse anti-human ABCA1; 5 µg/ml; Abcam Cat.  
385 #ab18180) and, ABCA3 (lamellar bodies ABC transporter marker; rabbit anti-human ABCA3; 2  
386 µg/ml; Abcam Cat. #ab99856). Secondary Abs were donkey anti-rabbit IgG H&L conjugated to  
387 Alexa Fluor® 647 (Abcam Cat. #ab150063) and donkey anti-mouse IgG H&L conjugated to  
388 Alexa Fluor® 568 (Abcam Cat. #ab175700). Negative controls were included to check for non-  
389 specific binding and false-positive results, including wells incubated with isotypes control  
390 antibodies or in which primary Abs were omitted. Isotype controls were mouse IgG1 isotype  
391 (Abcam Cat. #ab91353) and rabbit IgG isotype (Invitrogen Cat. #26102). The nucleus was  
392 stained with 50 ng/ml 4',6-diamidino-2-phenylindole (DAPI) (Invitrogen Cat. #D1306) for 10 min



393 at room temperature. After multiple washes to remove the excess of DAPI solution, coverslips  
394 were mounted on slides using ProLong Gold Antifade Reagent (Invitrogen Cat. #P36934).

395 Cells were visualized by laser scanning confocal microscopy using ZEISS LSM 800 microscope  
396 set at appropriate parameters and a final magnification of 600X. Co-localization events of the  
397 different cellular compartments containing GFP-*M.tb* Erdman was quantified by counting at least  
398 100 events per condition in duplicate. All microscopy data were analyzed with Zeiss ZEN  
399 Software.

400

401 **AT compartment acidification assay** - AT compartment acidification was determined by  
402 LysoTracker-Red® assay (Invitrogen Cat. #L7528), at 72 hours post-infection following the  
403 manufacturer's instructions. See Supplementary Information for details.

404

405 **Transmission electron microscopy** - ATs monolayers were infected for 2 h with A-ALF-  
406 exposed *M.tb* or E-ALF-exposed *M.tb* at MOI 100:1 and processed as mentioned previously.  
407 Infected ATs, at 72 hours post-infection were fixed in 2.5% glutaraldehyde and 2% formaldehyde  
408 (in 0.1 M Na Cacodylate pH 7.3) and analyzed by transmission electron microscopy (TEM) as  
409 previously described<sup>46, 47</sup> with minor changes. See Supplementary Information for details.

410 Samples were shipped to Dr. Daniel L. Clemens, an expert in the study of intracellular  
411 compartmentalization of *M.tb* by TEM for analyses in a blinded manner.<sup>48-50</sup> The main objective  
412 was to quantify the relative proportion of bacilli located within membrane-bound vesicles or  
413 located in the cytosol compartment (lacking membrane bilayers around the bacilli). For each  
414 condition, at least 100 events were imaged and scored in a blinded fashion using the JEOL

415 100CX transmission electron microscope (BRI Electron Microscopy Core Facility; Brain  
416 Research Institute UCLA).

417

418 **Expression of AT surface markers by flow cytometry** - Following infection at different time  
419 points, ATs were stained with LIVE/DEAD (L/D) Fixable Dead Cell Kit (Invitrogen Cat. # L23105)  
420 following manufacturer's instructions, and a panel of surface markers or matched isotype  
421 controls in deficient RPMI buffer, for 10 min in the dark at 4°C. Recombinant fluorescently-  
422 labelled Abs used were VioBlue HLA-ABC (1:50; REAfinity™ Cat. #130-120-435), PE HLA-  
423 DR/DP/DQ (1:50; REAfinity™ Cat. #130-120-715), APC CD324 [e-Cadherin] (1:50; REAfinity™  
424 Cat. #130-111-840); and isotypes controls were VioBlue human IgG1 (1:50; REAfinity™ Cat.  
425 #130-113-442), PE human IgG1 (1:50; REAfinity™ Cat. #130-113-438) and, APC human IgG1  
426 (1:50; REAfinity™ Cat. #130-113-434). Cells were then washed, fixed with 4% PFA, and follow  
427 by consequent washes before stored overnight at 4°C until analysis. Samples were analyzed  
428 using a FACSymphony A3 flow cytometer (BD Biosciences). Each sample for analysis contained  
429 5,000–100,000 events, and dead cells were subsequently gated out according to their L/D  
430 staining. All flow cytometry data were analyzed using FlowJo Version 10.6.2 software (FlowJo,  
431 LLC).

432

433 **AT cytokine and chemokine production** - Protein levels in supernatants from infected (*A-M.tb*  
434 and *E-M.tb*) or non-infected ATs were determined using a multiplex panel human magnetic bead  
435 Luminex® Assay for IL-6, CCL5/Rantes, GM-CSF, TNF- $\alpha$ , IL-1 $\beta$ , IL-18/IL-1F4, IL-10 and IL-  
436 12/IL-23 (R&D, Human 10-Plex Cat. #LXSAHM-10, Lot #L134898); and using Human enzyme-  
437 linked immunosorbent assay (ELISA) kits for IL-8/CXCL8 (dilution 1:5; R&D Cat. # DY208-05,  
438 Lot #P105639) and CCL2/MCP-1 (dilution 1:15; R&D Cat. # DY279-05, Lot #333900) following

439 the manufacturer's instructions. Human Luminex analysis was performed using Luminex200 (SN  
440 LX10009028406) with a xPONENT 4.3 Software version with the following parameters: DD gate  
441 8,000-16,500, 50  $\mu$ l of sample volume, 50-100 events per bead/region, and Low PMT  
442 (LMX100/200: Default). All cytokines and chemokines analyses were measured at 24 h and 120  
443 h post-infection. Some cytokines/chemokines levels were out of range, mainly reporting lower  
444 values. The dashed line (LLOQ and HLOQ) in those graphs indicates that the analyte levels are  
445 not necessary quantitatively determined with suitable accuracy.

446 **Statistical Analysis** - An unpaired, 2-tailed Student's *t*-Test for two-group comparisons was  
447 determined to assess statistical significance using GraphPad Prism 8 Software. In these studies,  
448 "n" values represent the number biological replicas using a different ALF sample from different  
449 adult or elderly human donors. Statistical differences between groups were reported as  
450 significant (\*) when the p-value is less than or equal to 0.05.

451

452

## 453 **ACKNOWLEDGEMENTS**

454 This study was supported by the National Institute on Aging (NIA), National Institutes of Health  
455 (NIH) (Grant number P01 AG-051428 to J.T., J.B.T., B.I.R and L.S.S.), and J.B.T. was partially  
456 supported by Robert J. Kleberg, Jr. and Helen C. Kleberg Foundation. The research reported in  
457 this publication was also partially supported by the Office of the Director, NIH under Award  
458 Number S10OD028653. The content is solely the responsibility of the authors and does not  
459 necessarily represent the official views of the National Institutes of Health. A.M.O.-F. was  
460 supported by the Douglass Graduate Fellowship at Texas Biomedical Research Institute.

461

462

463 **AUTHOR CONTRIBUTIONS**

464 A.M.O.-F. and J.B.T. contributed to the design of the studies. A.M.O.-F., J.M.S. and A.G.-V.  
465 contributed to the experimental procedures. A.M.O.-F. and J.M.S. contributed to the acquisition  
466 of data and data analyses. J.I.P. and D.J.M. performed bronchoalveolar lavages (BAL) and  
467 provided the BAL fluid samples. D.L.C. provided TB-transmission electron microscopy expertise  
468 and scoring the samples by blinded analysis. J.B.T., L.S.S., J.T., D.L.C. and B.I.R provided a  
469 critical analysis of the data and editing of manuscript. A.M.O.-F. and J.B.T. wrote the manuscript.

470

471

472 **ADDITIONAL INFORMATION**

473 **Supplementary information:** The online version contains supplementary material available at  
474 [https:](https://)

475 **Competing interests:** The authors declare no competing interests.

476

477

478

479

480

481

482

483 **REFERENCES**

- 484
- 485 1. Martini, M., Barberis, I., Gazzaniga, V. & Icardi, G. The fight to end tuberculosis: a  
486 global challenge in strong partnership. *J Prev Med Hyg.* **61** (1 Suppl 1), E1-E2 (2020).  
487
- 488 2. Guerra-Laso, J. M. *et al.* Macrophages from elders are more permissive to intracellular  
489 multiplication of *Mycobacterium tuberculosis*. *Age (Dordr).* **35** (4), 1235-1250 (2013).  
490
- 491 3. Schaaf, H. S., Collins, A., Bekker, A. & Davies, P. D. Tuberculosis at extremes of age.  
492 *Respirology.* **15** (5), 747-763 (2010).  
493
- 494 4. Arcos, J. *et al.* Human Lung Hydrolases Delineate *Mycobacterium tuberculosis*-  
495 Macrophage Interactions and the Capacity to Control Infection. *J Immunol.* **187** (1), 372-381  
496 (2011).  
497
- 498 5. Ferguson, J. S., Voelker, D. R., McCormack, F. X. & Schlesinger, L. S. Surfactant  
499 protein D binds to *Mycobacterium tuberculosis* bacilli and lipoarabinomannan via  
500 carbohydrate-lectin interactions resulting in reduced phagocytosis of the bacteria by  
501 macrophages. *J Immunol.* **163**, 312-321 (1999).  
502
- 503 6. Gaynor, C. D. *et al.* Pulmonary surfactant protein A mediates enhanced phagocytosis of  
504 *Mycobacterium tuberculosis* by a direct interaction with human macrophages. *J Immunol.* **155**  
505 (11), 5343-5351 (1995).  
506
- 507 7. Moliva, J. I. *et al.* Molecular composition of the alveolar lining fluid in the aging lung. *Age*  
508 (*Dordr*). **36** (3), 9633 (2014).  
509
- 510 8. Piergallini, T. J. & Turner, J. Tuberculosis in the elderly: Why inflammation matters. *Exp*  
511 *Gerontol.* (2017).  
512
- 513 9. Moliva, J. I. *et al.* The Lung Mucosa Environment in the Elderly Increases Host  
514 Susceptibility to *Mycobacterium tuberculosis* Infection. *J Infect Dis.* **220** (3), 514-523 (2019).  
515
- 516 10. Arcos, J. *et al.* *Mycobacterium tuberculosis* Cell Wall released Fragments by the Action  
517 of the Human Lung Mucosa modulate Macrophages to Control Infection in an IL-10-Dependent  
518 Manner. *Mucosal Immunol.* **10** (5), 1248-1258 (2017).  
519
- 520 11. Scordo, J. M. *et al.* *Mycobacterium tuberculosis* Cell Wall Fragments Released upon  
521 Bacterial Contact with the Human Lung Mucosa Alter the Neutrophil Response to Infection.  
522 *Front Immunol.* **8**, 307 (2017).  
523
- 524 12. Bermudez, L. E. & Goodman, J. *Mycobacterium tuberculosis* Invades and Replicates  
525 within Type II Alveolar Cells. *Infect Immun.* **64**, 1400-1406 (1996).  
526
- 527 13. Scordo, J. M. *et al.* The human lung mucosa drives differential *Mycobacterium*  
528 *tuberculosis* infection outcome in the alveolar epithelium. *Mucosal Immunol.* **12**, 795-804  
529 (2019).  
530

- 531 14. Ward, H. E. & Nicholas, T. E. Alveolar type I and type II cells. *Aust NZ J Med.* **14** (5  
532 Suppl 3), 731-734 (1984).  
533
- 534 15. Fehrenbach, H. Alveolar epithelial type II cell: defender of the alveolus revisited. *Respir*  
535 *Res.* **2** (1), 33-46 (2001).  
536
- 537 16. Torrelles, J. B. & Schlesinger, L. S. Integrating Lung Physiology, Immunology, and  
538 Tuberculosis. *Trends Microbiol.* **25** (8), 688-697 (2017).  
539
- 540 17. Olmo-Fontáñez, A. M. & Torrelles, J. B. Alveolar Epithelial Cells. In *Advances in Host-*  
541 *Directed Therapies Against Tuberculosis* (Karakousis PC, Hafner R, Gennaro ML, eds) 247-  
542 255. (Springer International Publishing, Cham, 2021).  
543
- 544 18. Bermudez, L. E. *et al.* The Efficiency of the Translocation of *Mycobacterium*  
545 *tuberculosis* across a Bilayer of Epithelial and Endothelial cells as a Model of the Alveolar Wall  
546 Is a Consequence of Transport within Mononuclear Phagocytes and Invasion of Alveolar  
547 Epithelial Cells. *Infect Immun.* **70** (1), 140-146 (2002).  
548
- 549 19. Menozzi, F. D. *et al.* Molecular characterization of the mycobacterial heparin-binding  
550 hemagglutinin, a mycobacterial adhesin. *Proc Natl Acad Sci USA.* **95**, 12625-12630 (1998).  
551
- 552 20. Kinhikar, A. G. *et al.* Mycobacterium tuberculosis malate synthase is a laminin-binding  
553 adhesin. *Mol Microbiol.* **60** (4), 999-1013 (2006).  
554
- 555 21. Sato, K. *et al.* Type II alveolar cells play roles in macrophage-mediated host innate  
556 resistance to pulmonary mycobacterial infections by producing proinflammatory cytokines. *J*  
557 *Infect Dis.* **185** (8), 1139-1147 (2002).  
558
- 559 22. Carterson, A. J. *et al.* A549 lung epithelial cells grown as three-dimensional aggregates:  
560 alternative tissue culture model for *Pseudomonas aeruginosa* pathogenesis. *Infect Immun.* **73**  
561 (2), 1129-1140 (2005).  
562
- 563 23. Sukumar, N., Tan, S., Aldridge, B. B. & Russell, D. G. Exploitation of Mycobacterium  
564 tuberculosis reporter strains to probe the impact of vaccination at sites of infection. *PLoS*  
565 *Pathog.* **10** (9), e1004394 (2014).  
566
- 567 24. Harriff, M. J. *et al.* Human lung epithelial cells contain Mycobacterium tuberculosis in a  
568 late endosomal vacuole and are efficiently recognized by CD8(+) T cells. *PLoS ONE.* **9** (5),  
569 e97515 (2014).  
570
- 571 25. Jamwal, S. V. *et al.* Mycobacterial escape from macrophage phagosomes to the  
572 cytoplasm represents an alternate adaptation mechanism. *Sci Rep.* **6**, 23089 (2016).  
573
- 574 26. van der Wel, N. *et al.* *M. tuberculosis* and *M. leprae* translocate from the  
575 phagolysosome to the cytosol in myeloid cells. *Cell.* **129** (7), 1287-1298 (2007).  
576
- 577 27. Chuquimia, O. D. *et al.* The role of alveolar epithelial cells in initiating and shaping  
578 pulmonary immune responses: communication between innate and adaptive immune systems.  
579 *PLoS ONE.* **7** (2), e32125 (2012).

580

581 28. Corbiere, V. *et al.* Phenotypic characteristics of human type II alveolar epithelial cells  
582 suitable for antigen presentation to T lymphocytes. *Respir Res.* **12**, 15 (2011).

583

584 29. Scordo, J. M., Knoell, D. L. & Torrelles, J. B. Alveolar Epithelial Cells in *Mycobacterium*  
585 *tuberculosis* Infection: Active Players or Innocent Bystanders? *J Innate Immun.* **8** (1), 3-14  
586 (2016).

587

588 30. Menon, S. *et al.* Convergence of a diabetes mellitus, protein energy malnutrition, and  
589 TB epidemic: the neglected elderly population. *BMC Infect Dis.* **16**, 361 (2016).

590

591 31. Feng, J. Y. *et al.* Impact of cigarette smoking on latent tuberculosis infection: does age  
592 matter? *Eur Respir J.* **43** (2), 630-632 (2014).

593

594 32. Lerner, T. R., Borel, S. & Gutierrez, M. G. The innate immune response in human  
595 tuberculosis. *Cell Microbiol.* **17** (9), 1277-1285 (2015).

596

597 33. Lafuse, W. P. *et al.* Identification of an Increased Alveolar Macrophage Subpopulation in  
598 Old Mice That Displays Unique Inflammatory Characteristics and Is Permissive to  
599 *Mycobacterium tuberculosis* Infection. *J Immunol.* **203** (8), 2252-2264 (2019).

600

601 34. Li, Y., Wang, Y. & Liu, X. The Role of Airway Epithelial Cells in Response to  
602 *Mycobacteria* Infection. *Clin Dev Immunol.* **2012**, 791392 (2012).

603

604 35. Fratti, R. A. *et al.* Role of phosphatidylinositol 3-kinase and Rab5 effectors in  
605 phagosomal biogenesis and mycobacterial phagosome maturation arrest. *J Cell Biol.* **154** (6),  
606 631-644 (2001).

607

608 36. Via, L. E. *et al.* Arrest of mycobacterial phagosome maturation is caused by a block in  
609 vesicle fusion between stages controlled by rab5 and rab7. *J Biol Chem.* **272**, 13326-13331  
610 (1997).

611

612 37. Fine, K. L. *et al.* Involvement of the autophagy pathway in trafficking of *Mycobacterium*  
613 *tuberculosis* bacilli through cultured human type II epithelial cells. *Cell Microbiol.* **14** (9), 1402-  
614 1414 (2012).

615

616 38. Sturgill-Koszycki, S. *et al.* Lack of acidification in *Mycobacterium* phagosomes produced  
617 by exclusion of the vesicular proton-ATPase. *Science.* **263**, 678-681 (1994).

618

619 39. Ouimet, M. *et al.* *Mycobacterium tuberculosis* induces the miR-33 locus to reprogram  
620 autophagy and host lipid metabolism. *Nat Immunol.* **17** (6), 677-686 (2016).

621

622 40. Gutierrez, M. G. *et al.* Autophagy is a defense mechanism inhibiting BCG and  
623 *Mycobacterium tuberculosis* survival in infected macrophages. *Cell.* **119** (6), 753-766 (2004).

624

625 41. Schmid, D. *et al.* Autophagy in innate and adaptive immunity against intracellular  
626 pathogens. *J Mol Med (Berl).* **84** (3), 194-202 (2006).

627



- 628 42. Houben, D. *et al.* ESX-1-mediated translocation to the cytosol controls virulence of  
629 mycobacteria. *Cell Microbiol.* **14** (8), 1287-1298 (2012).  
630
- 631 43. Ryndak, M. B., Singh, K. K., Peng, Z. & Laal, S. Transcriptional profile of  
632 *Mycobacterium tuberculosis* replicating in type II alveolar epithelial cells. *PLoS One.* **10** (4),  
633 e0123745 (2015).  
634
- 635 44. Arnett, E. *et al.* PPARgamma is critical for *Mycobacterium tuberculosis* induction of Mcl-  
636 1 and limitation of human macrophage apoptosis. *PLoS Pathog.* **14** (6), e1007100 (2018).  
637
- 638 45. Salunke, S. B. *et al.* Design and synthesis of novel anti-tuberculosis agents from the  
639 celecoxib pharmacophore. *Bioorg Med Chem.* **23** (9), 1935-1943 (2015).  
640
- 641 46. Kushida, H. Propylene Oxide as a Dehydrating Agent for Embedding with Epoxy  
642 Resins. *Journal of Electronmicroscope.* **10** (3), 203-204 (1961).  
643
- 644 47. Glauert, A. M. *Fixation, Dehydration and Embedding of Biological Specimens.* 1st  
645 edn.(Elsevier Science 1975).  
646
- 647 48. Clemens, D. L. Characterization of the *Mycobacterium tuberculosis* phagosome. *Trends*  
648 *Microbiol.* **4** (3), 113-118 (1996).  
649
- 650 49. Clemens, D. L., Lee, B. Y. & Horwitz, M. A. Deviant expression of Rab5 on phagosomes  
651 containing the intracellular pathogens *Mycobacterium tuberculosis* and *Legionella*  
652 *pneumophila* is associated with altered phagosomal fate. *Infect Immun.* **68** (5), 2671-2684  
653 (2000).  
654
- 655 50. Clemens, D. L., Lee, B.-Y. & Horwitz, M. A. *Mycobacterium tuberculosis* and *Legionella*  
656 *pneumophila* phagosomes exhibit arrested maturation despite acquisition of Rab7. *Infect*  
657 *Immun.* **68** (9), 5154-5166 (2000).  
658  
659  
660  
  
661  
  
662  
  
663  
  
664  
  
665  
  
666  
  
667  
  
668



669 **FIGURE LEGENDS**

670 **Figure 1. Exposure of *M.tb* to elderly human ALF is associated with increased bacterial**  
671 **intracellular growth in ATs.** ATs were infected with ALF-exposed *M.tb* (H<sub>37</sub>R<sub>v</sub>-Lux) for 2 h at  
672 Multiplicity of Infection (MOI) of 10:1 followed by 1 h of gentamicin to kill extracellular *M.tb*. **(A)**  
673 Infected monolayers in 96-well plates were read for increased luminescence (indicative of *M.tb*  
674 H<sub>37</sub>R<sub>v</sub>-Lux intracellular growth in ATs) over time (up to 120 h), using the GLOMAX reading  
675 system. **(B)** No differences in bacteria inoculum between conditions. **(C)** No differences in  
676 bacteria uptake by ATs after 2 h post-infection. Overall data of n=4 experiment in triplicate [Mean  
677 ± SEM], using four different A-ALFs and E-ALFs. Student's unpaired *t*-Test; Adult vs Elderly,  
678 \*p<0.05, \*\*p<0.01, \*\*\*p<0.001, ns: no significant differences. A: Adult ALF-exposed *M.tb* (white  
679 bar), E: Elderly ALF-exposed *M.tb* (black bar), RLUs: Relative Lux Units; "n" values represent  
680 the number biological replicas using a different ALF sample from different adult or elderly human  
681 donors.

682

683 **Figure 2. Elderly ALF-exposed *M.tb* has enhanced early replication during ATs infection.**

684 ATs were infected with the reporter SSB-GFP, smyc':mCherry *M.tb* strain for up to 72 h, and  
685 *M.tb* replication rate was determined by confocal microscopy. **(A)** Percentage of SSB+*M.tb*  
686 exposed to A- and E-ALFs at 24 h and 72 h post-infection, n=2-4 [Mean ± SEM], using two  
687 different A-ALFs and four different E-ALFs. **(B)** Representative confocal images of ATs infected  
688 with A- and E-ALF-*M.tb* at 72 h post-infection. The region indicated by gray dashed-line is shown  
689 expanded on the right (top panels, A-ALF; bottom panels, E-ALF). Replicating SSB+*M.tb* are  
690 indicated by white arrowheads, showing merged (yellow) foci. Events were enumerated by  
691 counting at least 50 independent events, in replicates. Student's unpaired *t*-Test; Adult vs  
692 Elderly, \*p<0.05, \*\*p<0.01, \*\*\*p<0.001, ns: no significant differences. A: Adult exposed *M.tb*, E:

693 Elderly exposed *M.tb*; “n” values represent the number biological replicas using a different ALF  
694 sample from different adult or elderly human donors.

695

696 **Figure 3. E-ALF drive decrease *M.tb* bacilli trafficking late endosomes within ATs.** ATs  
697 were infected with either A-ALF or E-ALF-exposed GFP *M.tb* for 2 h at Multiplicity of Infection  
698 (MOI) of 10:1 followed by 1 h of gentamicin to kill extracellular *M.tb*. Monolayers were stained  
699 with different intracellular markers at 72 h post-infection. **(A)** Semi-quantification of  
700 Rab5+Rab7+*M.tb* (indicative of *M.tb* movement from early to late endosomes) co-localization  
701 events and Rab7+*M.tb* co-localization events (indicative of *M.tb* already in late endosomes),  
702 n=3, using three different A-ALFs and E-ALFs. **(B)** Representative confocal images of ATs  
703 infected with A- and E-ALF-*M.tb* stained with intracellular markers Rab5 and Rab7. Events were  
704 enumerated by counting at least 100 independent events, in duplicate [Mean ± SEM]. The region  
705 indicated by gray dashed-line is shown expanded on the right; and co-localization events are  
706 indicated by white arrowheads. Open arrowheads indicate double co-localization events  
707 (Rab5+Rab7+). Student’s unpaired *t*-Test; Adult vs Elderly, \*p<0.05, \*\*p<0.01, \*\*\*p<0.001, ns:  
708 no significant differences. A: Adult exposed *M.tb*, E: Elderly exposed *M.tb*, DIC: Differential  
709 Interference Contrast, DAPI: 4',6-diamidino-2-phenylindole (ATs nuclear DNA); “n” values  
710 represent the number biological replicas using a different ALF sample from different adult or  
711 elderly human donors.

712

713 **Figure 4. A-ALF and E-ALF does not alter *M.tb* additional intracellular trafficking within**  
714 **ATs.** ATs were infected with either A-ALF or E-ALF-exposed GFP *M.tb* for 2 h at Multiplicity of  
715 Infection (MOI) of 10:1 followed by 1 h of gentamicin to kill extracellular *M.tb*. Stained with  
716 different intracellular markers at 72 h post-infection. **(A)** Semi-quantification of LAMP-1+*M.tb* co-  
717 localization events (indicative of *M.tb* in lysosomes) and LC3+*M.tb* co-localization events

718 (indicative of *M.tb* in autophagosomes), n=5, using five different A-ALFs and E-ALFs. **(B)**  
719 Representative confocal images of ATs infected with A- and E-ALF-*M.tb* stained with intracellular  
720 markers LAMP-1 and LC3. **(C)** Semi-quantification of CD63+*M.tb* co-localization events  
721 (indicative of *M.tb* in lysosomes), n=3, using three different A-ALFs and E-ALFs. **(D)**  
722 Representative confocal images of ATs infected with A- and E-ALF-*M.tb* stained with intracellular  
723 marker CD63. **(E)** Semi-quantification of ABCA1+*M.tb* co-localization events (indicative of *M.tb*  
724 in multivesicular bodies) and ABCA3+*M.tb* co-localization events (indicative of *M.tb* in lamellar  
725 bodies), n=3, using three different A-ALFs and E-ALFs. **(F)** Representative confocal images of  
726 ATs infected with A- and E-ALF-*M.tb* stained with intracellular markers ABCA1 and ABCA3.  
727 Events were enumerated by counting at least 100 independent events, in duplicate [Mean  $\pm$   
728 SEM]. The region indicated by gray dashed-line is shown expanded on the right; and co-  
729 localization events are indicated by white arrowheads. Student's unpaired *t*-Test; Adult vs  
730 Elderly, \**p*<0.05, \*\**p*<0.01, \*\*\**p*<0.001, ns: no significant differences. A: Adult exposed *M.tb*, E:  
731 Elderly exposed *M.tb*, DIC: Differential Interference Contrast, DAPI: 4',6-diamidino-2-  
732 phenylindole (ATs nuclear DNA); n" values represent the number biological replicas using a  
733 different ALF sample from different adult or elderly human donors.

734

735 **Figure 5. Similar acidification rates of intracellular compartments containing A- and E-**  
736 **ALF-exposed *M.tb*.** **(A)** Semi-quantification of LysoTracker+*M.tb* acidification events, n=6  
737 [Mean  $\pm$  SEM], using six different A-ALFs and E-ALFs in infected ATs after 72 h. **(B)**  
738 Representative confocal images showing ALF-exposed GFP *M.tb* (top panels, A-ALF; bottom  
739 panels, E-ALF) co-localization with LysoTracker (red). Gray dashed-line box region is shown  
740 expanded on the right, with acidified events (yellow) indicated by white arrowheads. Events were  
741 enumerated by counting at least 100 independent events, in duplicate. Student's unpaired *t*-  
742 Test; Adult vs Elderly, \**p*<0.05, \*\**p*<0.01, \*\*\**p*<0.001, ns: no significant differences. A: Adult

743 exposed *M.tb*, E: Elderly exposed *M.tb*, DIC: Differential Interference Contrast, DAPI: 4',6-  
744 diamidino-2-phenylindole (ATs nuclear DNA); “n” values represent the number biological  
745 replicas using a different ALF sample from different adult or elderly human donors.

746

747 **Figure 6. ALF-exposed *M.tb* drives differences in intracellular localization within ATs.**

748 Relative proportion of intracellular bacteria located within a membrane-bound vesicles or free in  
749 the cytosol by TEM. (A) Coded samples were scored by blinded analysis to quantify A-ALF- and  
750 E-ALF-exposed *M.tb* located in vacuolar (endosomal/lysosomal) or cytosolic compartments,  
751 n=2. (B) Transmission electron micrographs of ALF-exposed *M.tb*. Adult ALF and Elderly ALF-  
752 exposed *M.tb* were scored as “cytosolic” if they were not enclosed within a membrane, or scored  
753 as “vacuolar” if they were surrounded by a vacuolar membrane. Vacuole membranes are  
754 indicated by black arrowheads. Bacteria are indicated by asterisks. Values were determined by  
755 counting at least 100 independent events (bacteria), in replicate [Mean ± SEM]. Student’s  
756 unpaired *t*-Test; \**p*<0.05, \*\**p*<0.01, \*\*\**p*<0.001, ns (or absence of line): no significant differences.  
757 A-V: Adult ALF-exposed *M.tb* in vacuolar compartment (Size bar 400 nm and 800 nm,  
758 respectively), A-C: Adult ALF-exposed *M.tb* in cytosolic compartment (Size bar 400 nm), E-V:  
759 Elderly ALF-exposed *M.tb* in vacuolar compartment (Size bar 600 nm and 200 nm, respectively),  
760 E-C: Elderly ALF-exposed *M.tb* in cytosolic compartment (Size bar 400 nm and 600 nm,  
761 respectively). (C) Normalized cellular compartment distribution of E-ALF-exposed vs. ALF-  
762 exposed *M.tb* within ATs; “n” values represent the number biological replicas using a different  
763 ALF sample from different adult or elderly human donors.

764

765 **Figure 7. Effect of A- and E-ALF-*M.tb* on AT surface markers expression.** Surface

766 expression of uninfected and infected ATs with either A-ALF or E-ALF-exposed *M.tb* were  
767 measured by flow cytometry. (A) Percentage of HLA-ABC (MHC Class I) expression overtime.

768 **(B)** Percentage of HLA-DR/DP/DQ (MHC Class II) expression overtime. Data shown are n=3  
769 [Mean  $\pm$  SEM], using three different A-ALFs and E-ALFs. Student's unpaired *t*-Test; Adult vs  
770 Elderly, \**p*<0.05, \*\**p*<0.01, \*\*\**p*<0.001, ns (or absence of line): no significant differences. A:  
771 Adult exposed *M.tb*, E: Elderly exposed *M.tb*, UI: Uninfected ATs; "n" values represent the  
772 number biological replicas using a different ALF sample from different adult or elderly human  
773 donors.

774

775 **Figure 8. Effect of A- and E-ALF-*M.tb* on the production of ATs immune mediators.** ATs  
776 supernatants from uninfected and infected ATs with either A-ALF or E-ALF-exposed *M.tb* were  
777 tested for cytokines **(A)** and chemokines **(B)** production and measured over time by Luminex  
778 multiplex assay following the manufacturer's instructions. Cell supernatants tested were  
779 undiluted and the data shown are n=5 (using five different A-ALFs and E-ALFs) and n=2  
780 (uninfected ATs conditions). For CCL-2/MCP-1 and IL-8/CXCL8 cell supernatants were diluted  
781 1:15 and 1:5, respectively, and measured over time by ELISA kits following the manufacturer's  
782 instructions. Student's unpaired *t*-Test [Mean  $\pm$  SEM]; Adult vs Elderly, \**p*<0.05, \*\**p*<0.01,  
783 \*\*\**p*<0.001, ns (or absence of line): no significant differences. A: Adult exposed *M.tb*, E: Elderly  
784 exposed *M.tb*, UI: Uninfected ATs, ND: Not detectable, LLOQ: Low limit of quantification, HLOQ:  
785 High limit of quantification.

786

787 **Figure 9. Schematic overview of the main findings in this study.** *Mycobacterium*  
788 *tuberculosis* (*M.tb*) exposure to alveolar lining fluid (ALF) from elderly individuals enhances  
789 intracellular growth in alveolar epithelial cells (ATs). Moreover, ATs infection with E-ALF-  
790 exposed *M.tb* does not show altered production of inflammatory mediators (cytokines and  
791 chemokines) or cell activation. A-ALF-exposed *M.tb* is mainly located in endosomal/lysosomal  
792 (vacuoles) controlling its growth, but interestingly, E-ALF-exposed *M.tb* appears to be located in

793 both vacuolar and cytosolic compartments. Overall, E-ALF seemingly promotes *M.tb* growth  
794 within ATs, preventing cell activation, and potentially exploiting the AT cytosol as a niche for  
795 survival. This illustration was created with BioRender (<https://biorender.com/>).

796

797

798

799

800

801

802

803

804

805

806

807

808

809

810

811

812

813

814

815

816

817

Figure 1

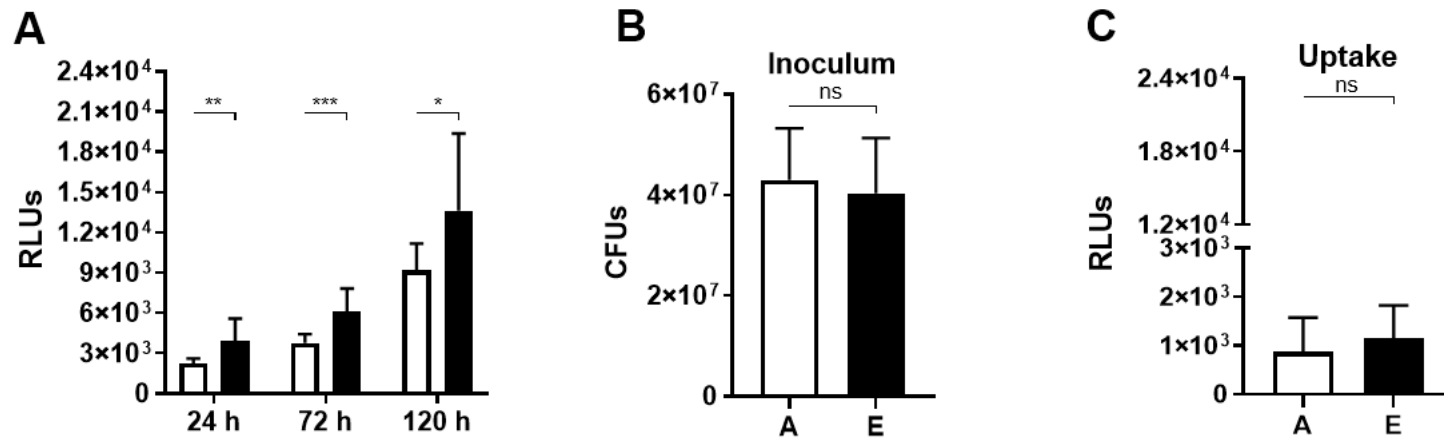

Figure 2

A

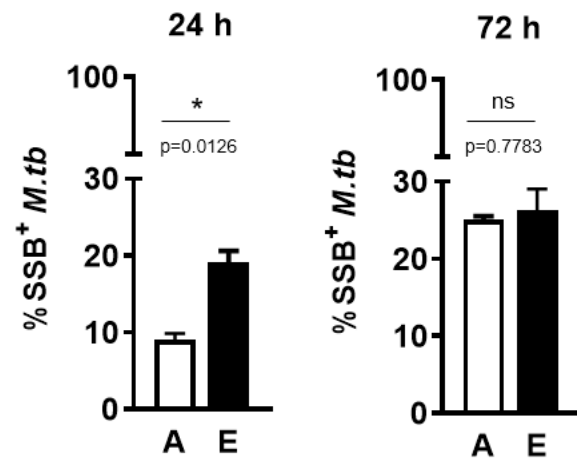

B

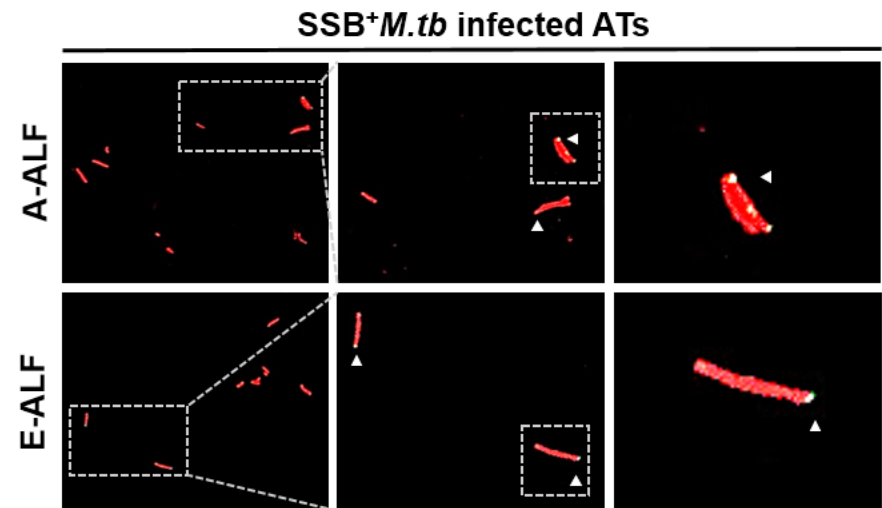



Figure 3

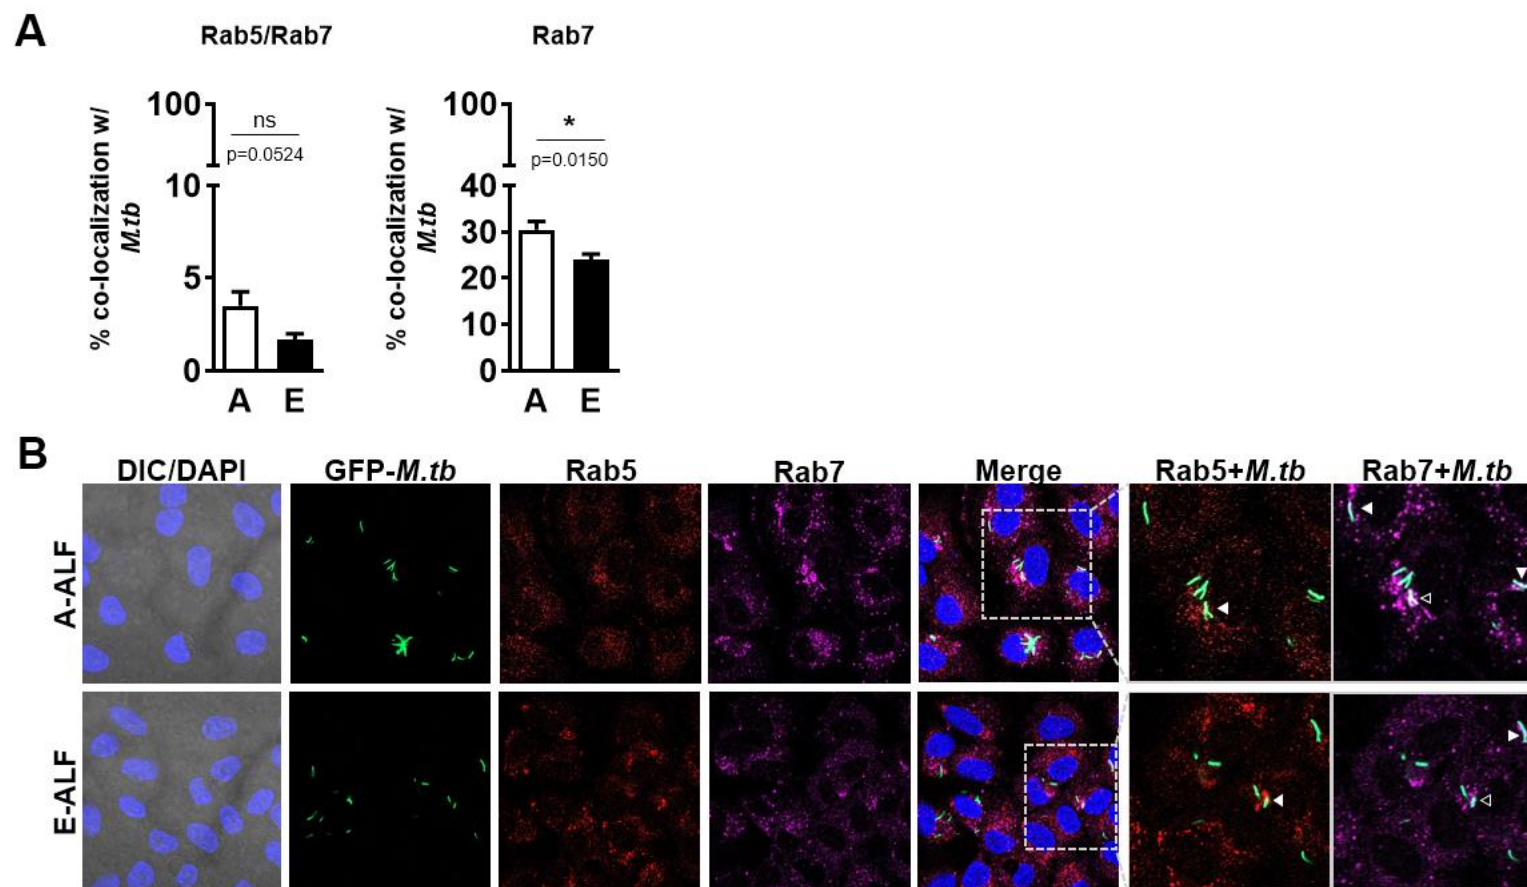

Figure 4

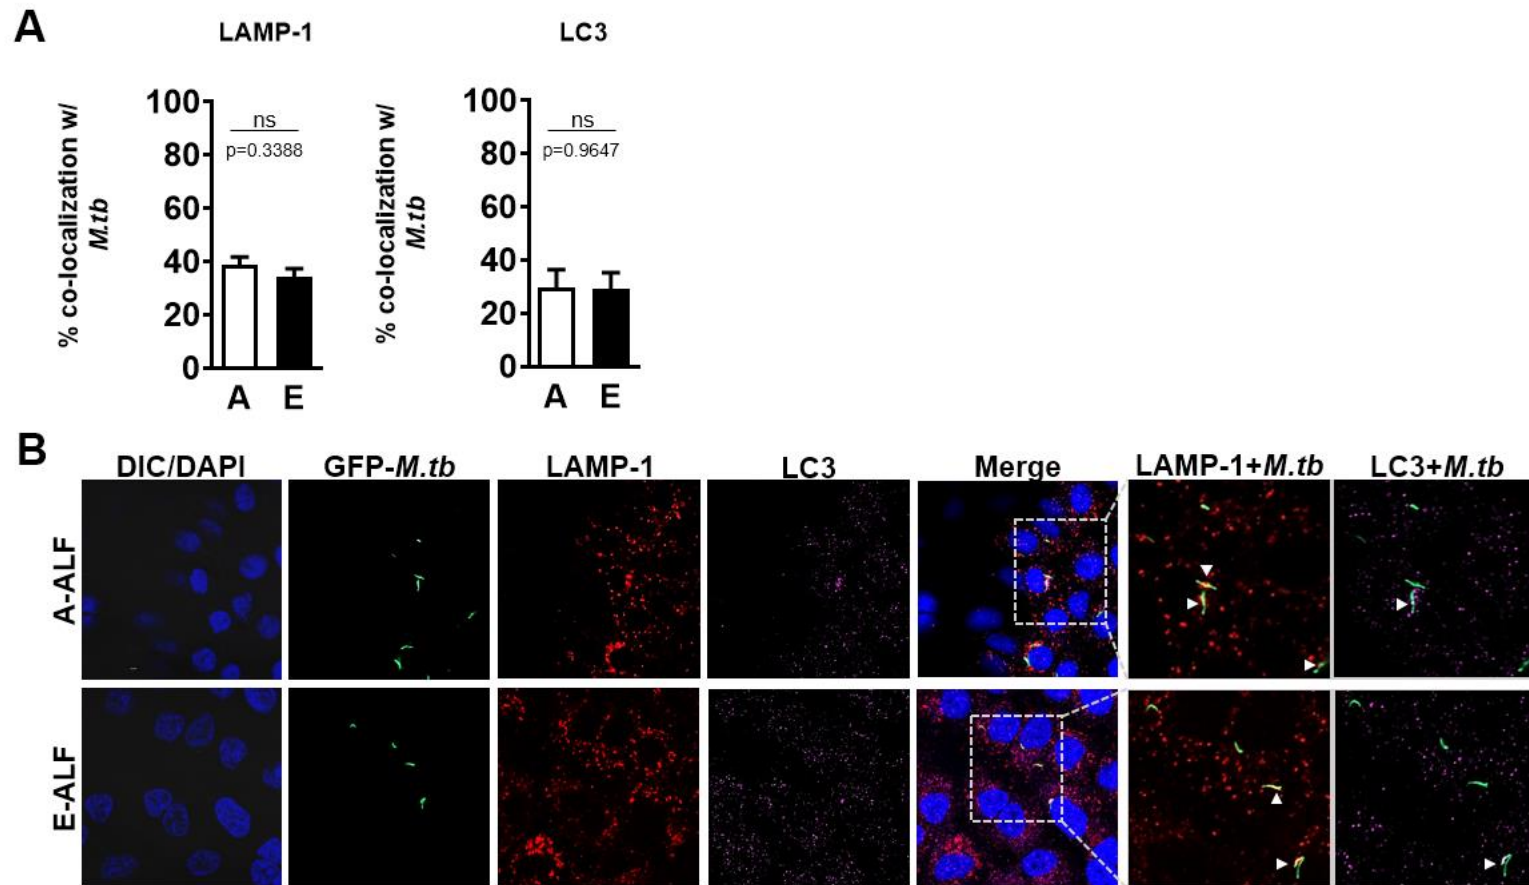

Figure 4 (Cont.)

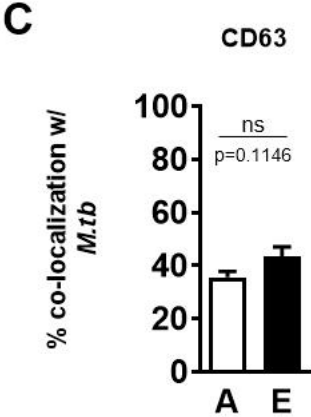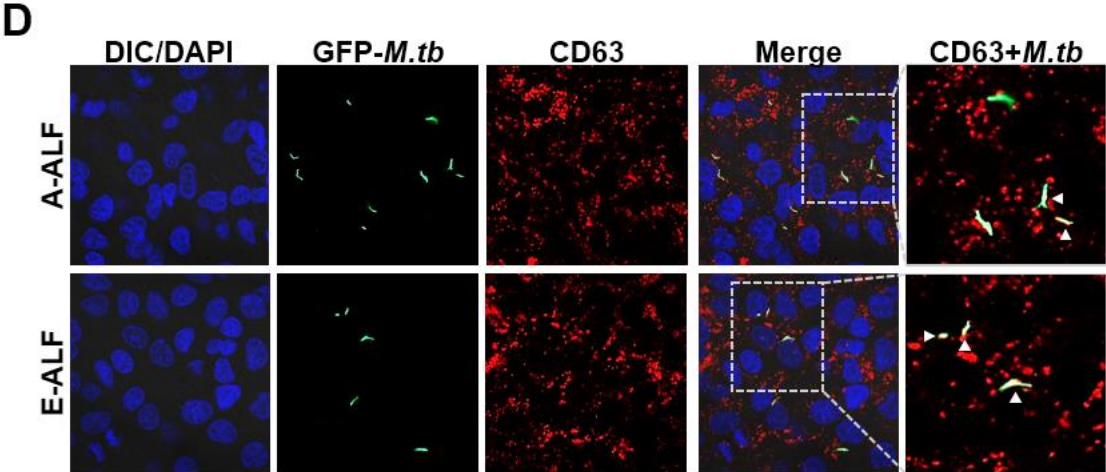

Figure 4 (Cont.)

E

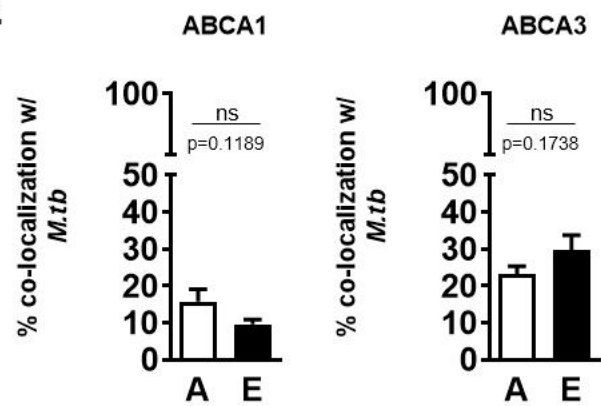

F

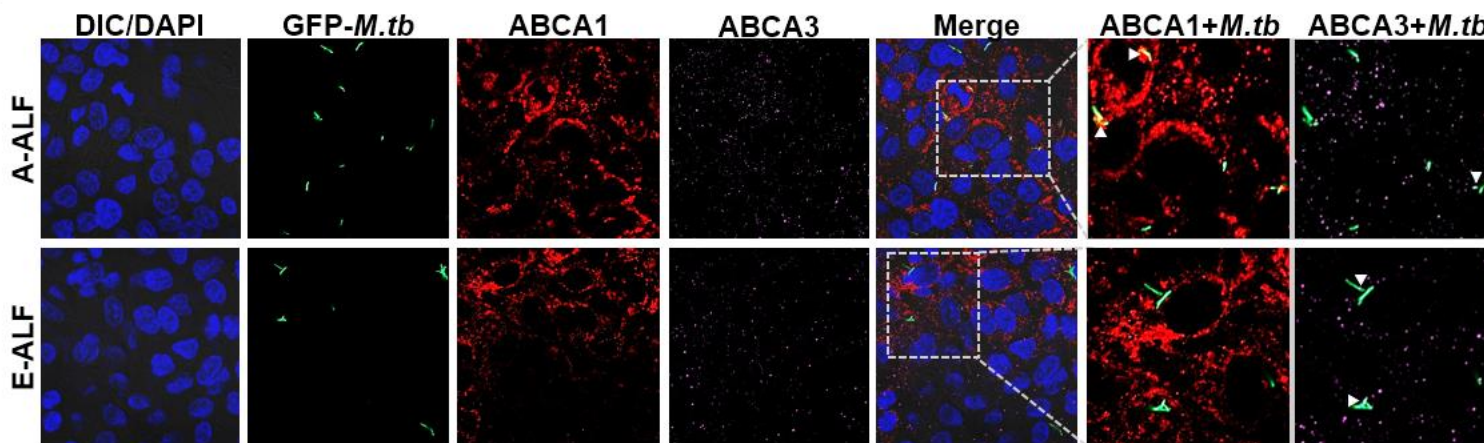

Figure 5

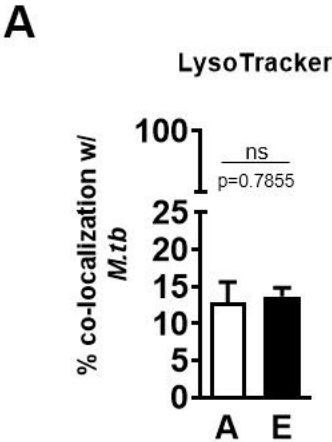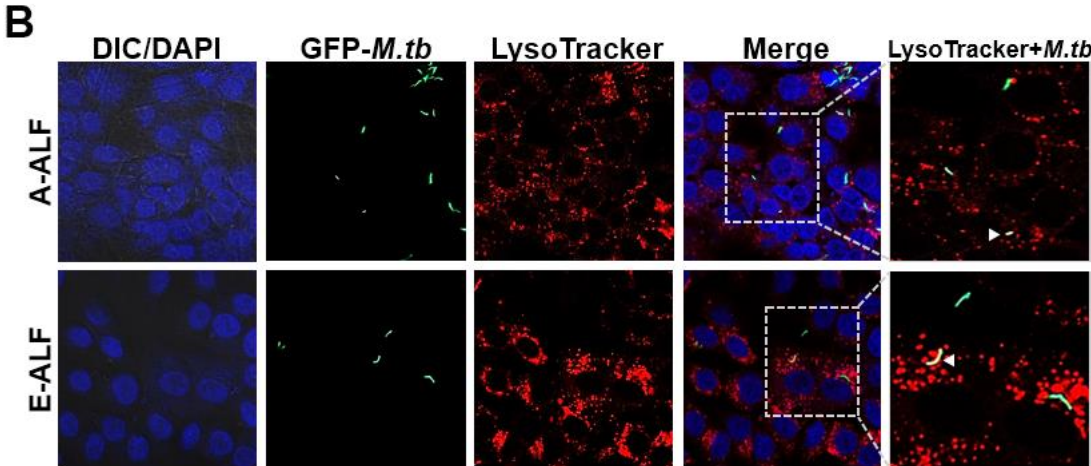

Figure 6

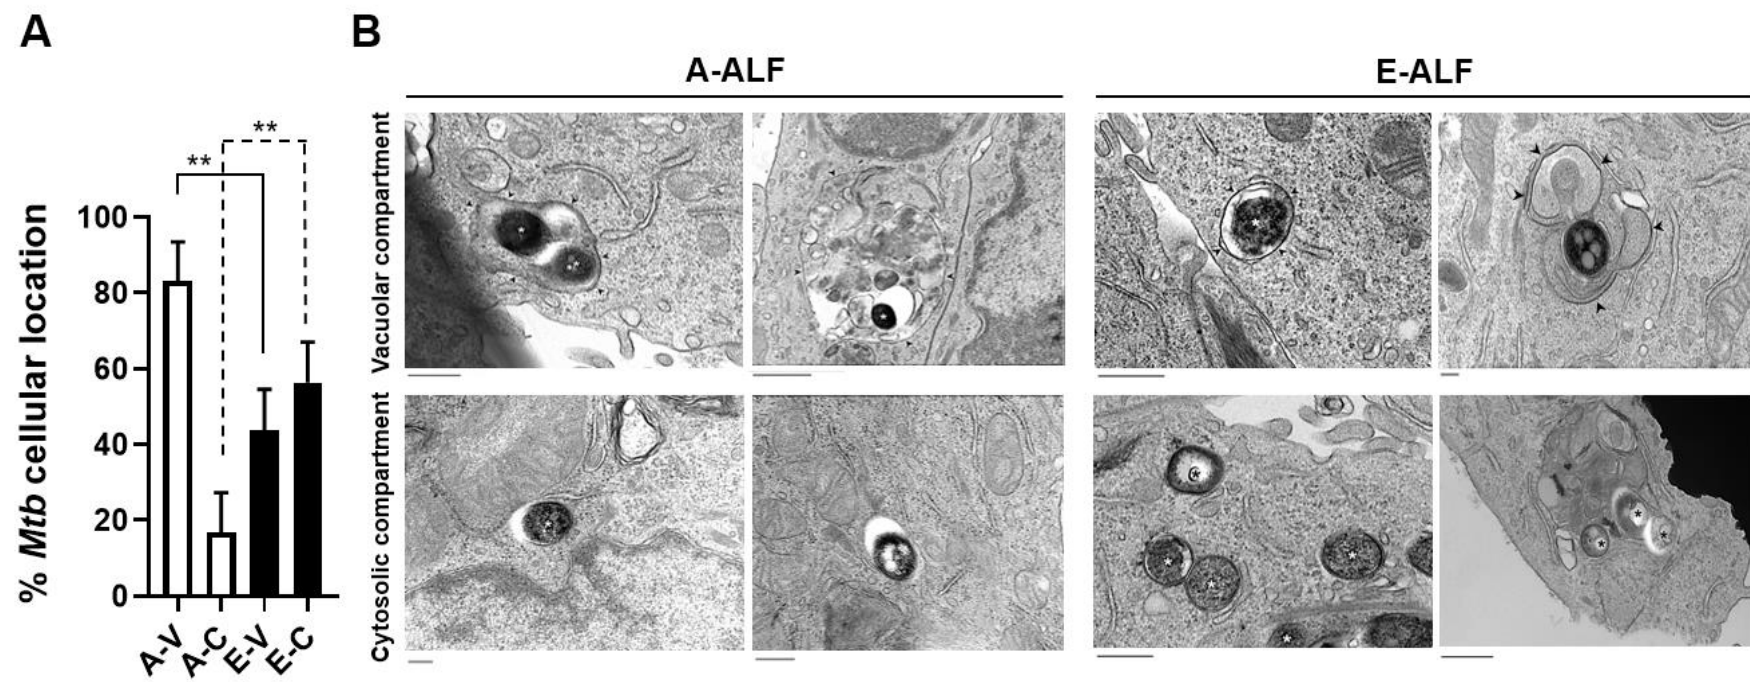



Figure 6 (Cont.)

C

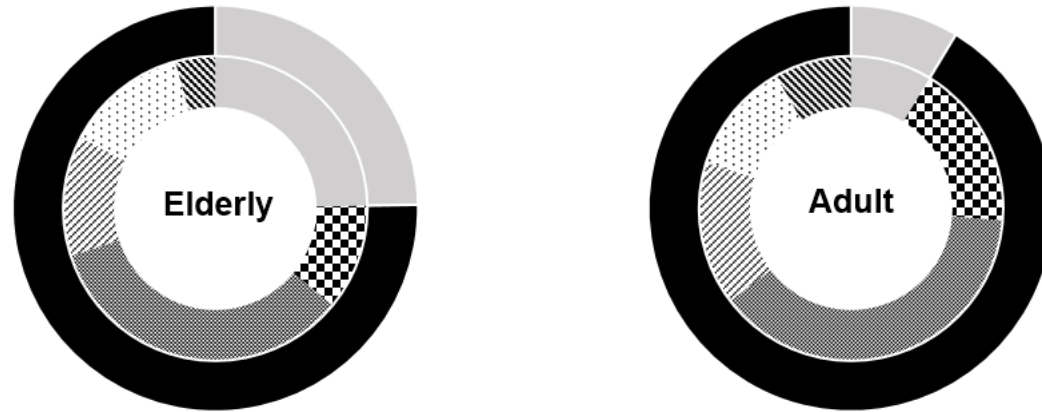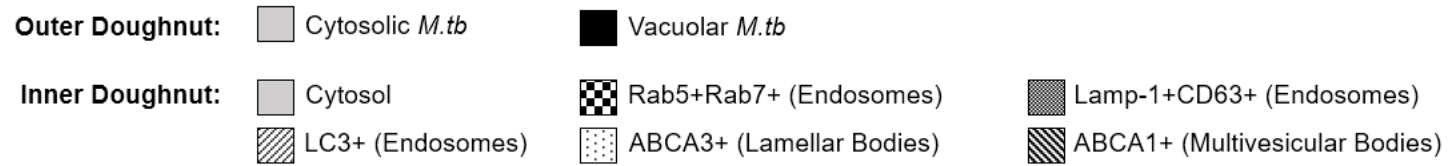

Figure 7

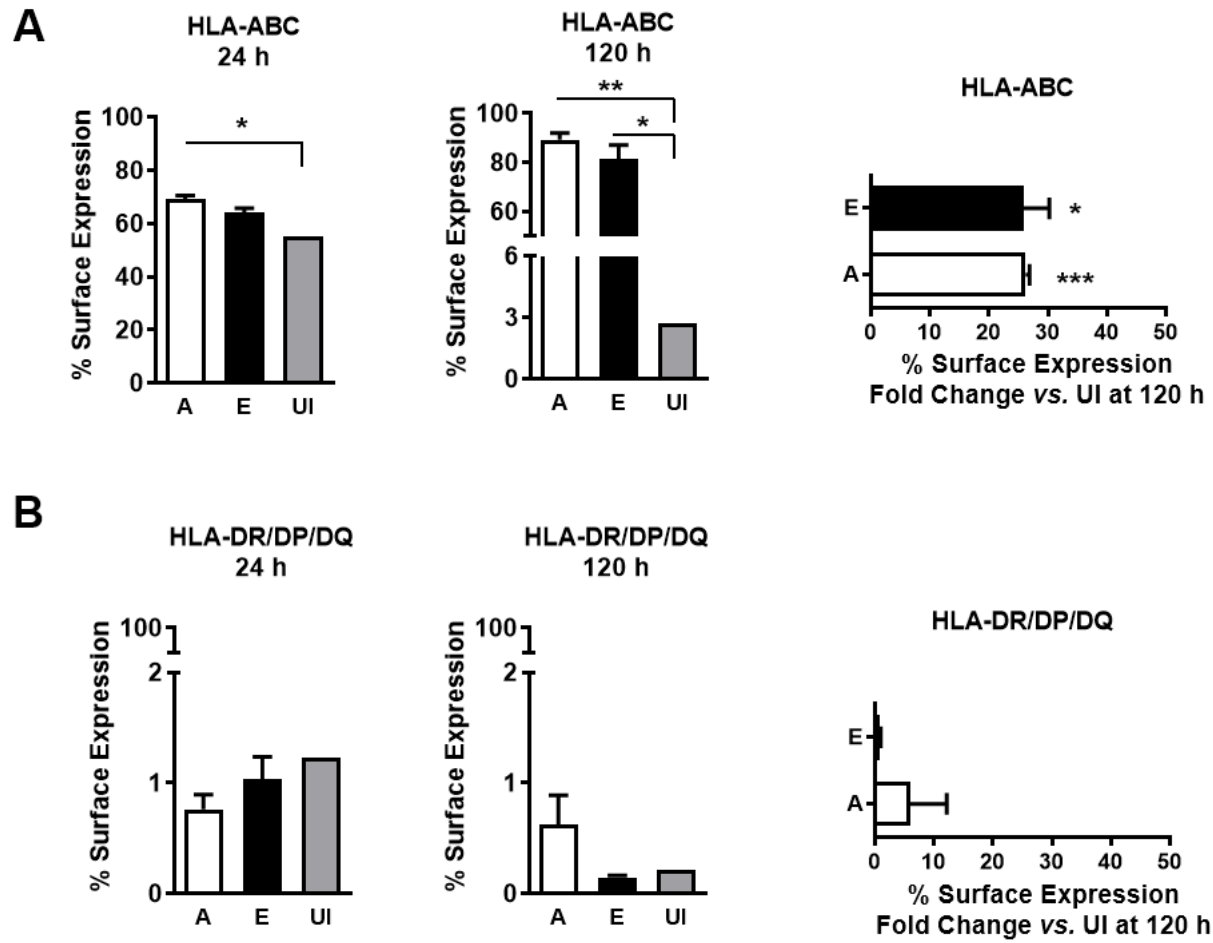



# Figure 8

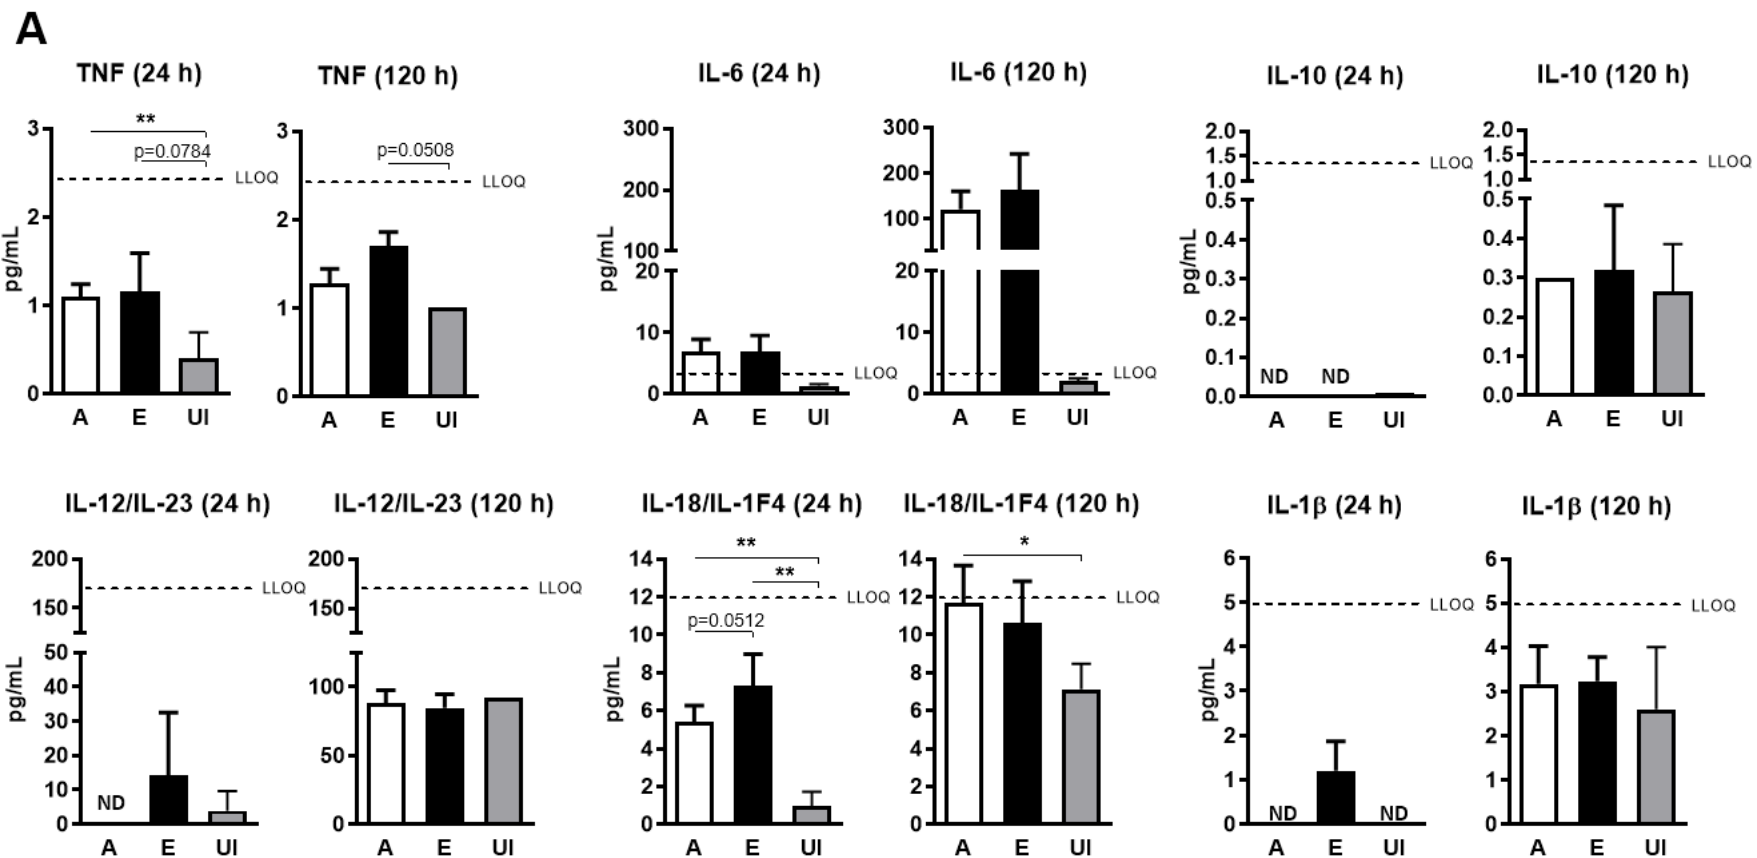

Figure 8 (Cont.)

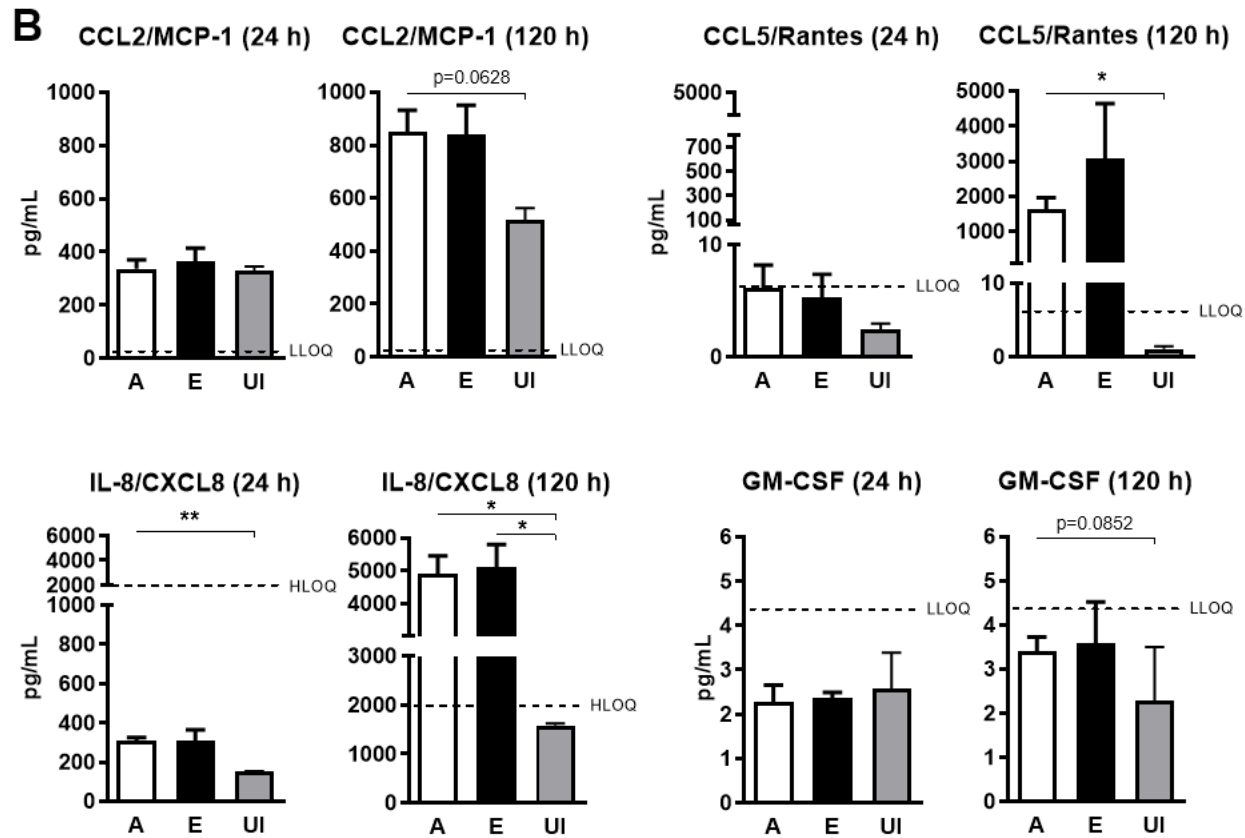

Figure 9

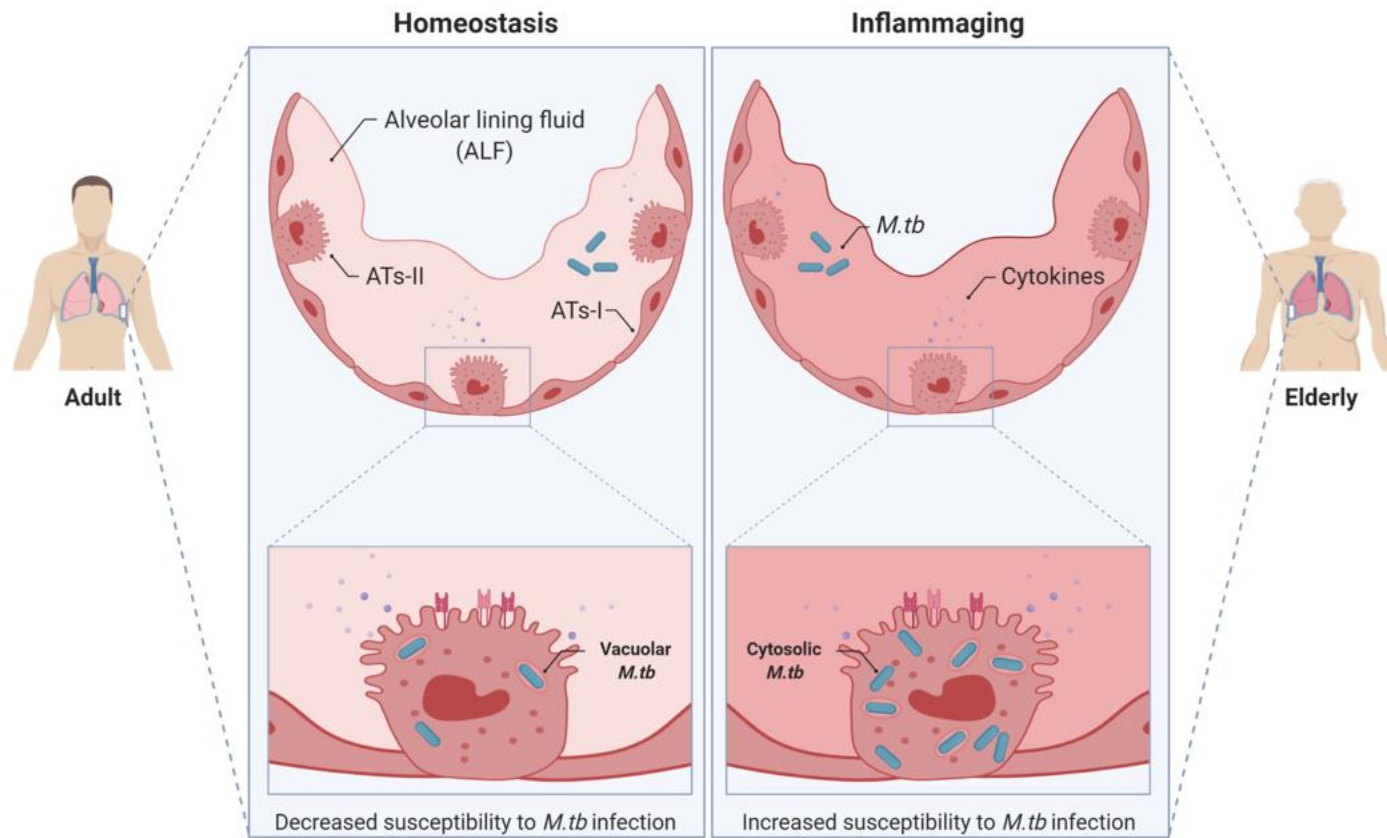

Source: https://biorxiv.org/content/10.1101/2021.05.12.443884v1.full.pdf
